1 ***Title***

2 **Fossils know it best: using a new set of fossil calibrations to improve the temporal**  
3 **phylogenetic framework of murid rodents (Rodentia: Myomorpha: Muroidea:**  
4 **Muridae)**

6 ***Authors***

7 Tatiana Aghová<sup>a,b,c\*</sup>, Yuri Kimura<sup>d</sup>, Josef Bryja<sup>a,c</sup>, Gauthier Dobigny<sup>e,f</sup>, Laurent Granjon<sup>e</sup>, Gael  
8 J. Kergoat<sup>g</sup>

10 ***Authors' affiliations***

11 <sup>a</sup> *Institute of Vertebrate Biology of the Czech Academy of Sciences, Květná 8, 603 65, Brno,*  
12 *Czech Republic*

13 <sup>b</sup> *Department of Zoology, National Museum, Václavské náměstí 68, 115 79, Prague, Czech*  
14 *Republic*

15 <sup>c</sup> *Department of Botany and Zoology, Faculty of Science, Masaryk University, Kotlářská 2, 611*  
16 *37, Brno, Czech Republic*

17 <sup>d</sup> *Department of Geology and Paleontology, National Museum of Nature and Science, 4-1-1*  
18 *Amakubo, Tsukuba, 305-0005 Ibaraki, Japan*

19 <sup>e</sup> *CBGP, IRD, CIRAD, INRA, Montpellier SupAgro, Univ. Montpellier, Montpellier, France*

20 <sup>f</sup> *Ecole Polytechnique d'Abomey-Calavi, Abomey-Calavi University, 01BP2009, Cotonou,*  
21 *Benin*

22 <sup>g</sup> *CBGP, INRA, CIRAD, IRD, Montpellier SupAgro, Univ. Montpellier, Montpellier, France*

23 \*Corresponding author: [tatiana.aghova@gmail.com](mailto:tatiana.aghova@gmail.com)

24

25 ***Running title:*** Dated phylogeny of Muridae

26 **Abstract**

27 Murid rodents (Rodentia: Myomorpha: Muroidea: Muridae) represent the most diverse and  
28 abundant mammalian group. In this study, we reconstruct a dated phylogeny of the family using  
29 a multilocus dataset (six nuclear and nine mitochondrial gene fragments) encompassing 160  
30 species representing 82 distinct murid genera from four extant subfamilies (Deomyinae,  
31 Gerbillinae, Lophiomyinae, and Murinae). In comparison with previous studies on murid or  
32 muroid rodents, our work stands out for the implementation of multiple fossil constraints within  
33 the Muridae thanks to a thorough review of the fossil record. Before being assigned to specific  
34 nodes of the phylogeny, all potential fossil constraints were carefully assessed; they were also  
35 subjected to several cross-validation analyses. The resulting phylogeny is consistent with  
36 previous phylogenetic studies on murids, and recovers the monophyly of all sampled murid  
37 subfamilies and tribes. Based on nine controlled fossil calibrations, our inferred temporal  
38 timeframe indicates that the murid family likely originated in the course of the Early Miocene,  
39 23.0-16.0 million years ago (Ma), and that most major lineages (i.e. tribes) have started  
40 diversifying *ca.* 10 Ma. Historical biogeography analyses support the Paleotropical origin for  
41 the family, with an initial internal split (vicariance event) followed by subsequent migrations  
42 between Afrotropical and Indomalayan lineages. During the course of their diversification, the  
43 biogeographic pattern of murids is marked by several dispersal events toward the Australasian  
44 and the Palearctic regions, mostly from the Indomalaya. The Afrotropical region was also  
45 secondarily colonized at least three times from the Indomalaya, indicating that the latter region  
46 has acted as a major centre of diversification for the family.

47

48 **Keywords**

49 Fossils, historical biogeography, molecular dating, Muridae, *Mus*, *Rattus*

50

## 51 **1. Introduction**

52 With about 150 genera and more than 730 recognized species, Muridae is the most diverse  
53 family of mammals (Musser and Carleton, 2005). Collectively murids have colonized highly  
54 distinct ecological niches, adapting to a wide array of environments ranging from warm (deserts  
55 or tropical forests) to cold habitats (high altitude mountain ranges, tundra; Vaughan et al.,  
56 2011). Life habits in murids are also diverse, as the family encompasses amphibious, arboreal,  
57 fossorial, or terrestrial taxa (Michaux et al., 2007; Musser and Carleton, 2005).

58 All murid species are native to the Old World (Musser and Carleton, 2005), but some  
59 species (especially the black rat *Rattus rattus* Linnaeus, the Norway rat *Rattus norvegicus*  
60 (Berkenhout) and the house mouse *Mus musculus* Linnaeus) now have a worldwide distribution  
61 due to commensalism and dissemination by humans. Murid species diversity is especially high  
62 in the Australasian and Indomalayan regions which accommodate half of the species diversity  
63 of the family (Rowe et al., 2016a). Second to that is the species diversity in the Afrotropical  
64 region (more than 200 species; Musser and Carleton, 2005). By contrast, there are much less  
65 native murid taxa in the Palearctic region (e.g. *Apodemus* Kaup, *Diplothrix* Thomas, or  
66 *Tokudaia* Kuroda).

67 The history of murid systematics is complex and convoluted with numerous changes  
68 occurring in the past sixty years (see Table 1 for a summary). Simpson (1945) divided  
69 representatives of family Muridae (as currently understood) into two separate families:  
70 Cricetidae (with subfamilies Gerbillinae, Lophiomyinae and others) and Muridae (subfamilies  
71 Murinae and Otomyinae). Chaline et al. (1977) considered “murid” rodents to belong to four  
72 families: Cricetidae (including Lophiomyinae), Gerbillidae, Muridae (exclusively Murinae)  
73 and Nesomyidae (including Otomyinae). Lavocat (1978) simplified this classification by  
74 recognizing only two families: Muridae (Murinae) and Nesomyidae (in which he included  
75 Gerbillinae, Lophiomyinae and Otomyinae). Another major change was later made by Carleton

76 and Musser (1984), who defined family Muridae in the broad sense with no less than 14  
77 subfamilies (including Gerbillinae, Lophiomyinae, Murinae and Otomyinae). Following the  
78 introduction of molecular systematics, changes in the classification of family Muridae  
79 continued at a fast rate. Using molecular phylogenetics Chevret et al. (1993a) demonstrated that  
80 *Acomys* I. Geoffroy is not a member of the subfamily Murinae but belongs to a separate  
81 monophyletic clade including *Deomys* Thomas, *Lophuromys* Peters and *Uranomys* Dollman.  
82 All four genera were assigned to the subfamily Deomyinae, which is closely related to the  
83 Gerbillinae. In another study, Chevret et al. (1993b) showed that Otomyinae are closely allied  
84 to the tribe Arvicanthini, thus unequivocally constituting a subset of the subfamily Murinae at  
85 the tribe level (Ducroz et al., 2001; Jansa and Weksler, 2004). Jansa and Weksler (2004) also  
86 strongly suggested that Lophiomyinae belonged to the Muridae. Only part of these proposals  
87 was followed by Musser and Carleton (2005) who recognized the following five subfamilies in  
88 the family Muridae: Deomyinae, Gerbillinae, Leimacomyinae, Murinae and Otomyinae.  
89 Nowadays the most consensual classification agrees on five subfamilies: Deomyinae (four  
90 genera and *ca.* 42 species), Gerbillinae (16 genera and *ca.* 103 species), Leimacomyinae (only  
91 one species, possibly extinct; Kingdon, 2015), Lophiomyinae (only one species) and Murinae  
92 (129 genera and *ca.* 584 species; see the review of Granjon and Montgelard, 2012).

93 Musser and Carleton's (2005) comprehensive catalogue listed 730 species in the family  
94 Muridae. Estimates of species diversity in this family are very likely not definitive, as new  
95 murid taxa are being regularly described (e.g. Carleton et al., 2015; Esselstyn et al., 2015;  
96 Missoupe et al., 2016; Mortelliti et al., 2016; Rowe et al., 2016a). Expected and ongoing raise in  
97 species number can be accounted for by an increased focus on poorly known regions with high  
98 levels of endemism, especially in tropical Asia and Africa. It is also linked with the  
99 development of integrative taxonomy studies, where molecular genetic approaches are able to



100 detect taxa and geographical regions with high cryptic diversity (e.g. Bryja et al., 2014, 2017;  
101 Ndiaye et al., 2016).

102 Because of the high species richness of the family, determining the precise timing of its  
103 radiation is of particular paleobiogeographic interest. Several dated estimates for the age of  
104 Muridae are available owing to studies either focusing on the order Rodentia (Adkins et al.,  
105 2001, 2003; Fabre et al., 2012; Montgelard et al., 2008), on the superfamily Muroidea  
106 (Muroidea; Schenk et al., 2013 ; Stepan et al., 2004) or on various murid subsets (e.g. Bryja  
107 et al., 2014; Chevret and Dobigny, 2005; Dobigny et al., 2013; Fabre et al., 2013; Pagès et al.,  
108 2016; Rowe et al., 2008, 2011, 2016b). However, no clear consensus could be reached for the  
109 age of the family Muridae. Indeed, age estimates derived from all aforementioned studies are  
110 far from being congruent, likely because their datasets have not been designed for this particular  
111 purpose. In addition, all these studies used very diverse dating procedures, some of them relying  
112 on substitution rate calibrations (e.g. Arbogast et al., 2001; Nicolas et al., 2008) whereas others  
113 used fixed ages (e.g. the putative *Mus/Rattus* split at 12 Ma; Stepan et al., 2004), very distant  
114 fossil constrains (Adkins et al., 2003; Fabre et al., 2012; Montgelard et al., 2008) or primary  
115 calibrations using various fossil constraints within or outside the family Muridae (e.g. Bryja et  
116 al., 2014; Pagès et al., 2016; Rowe et al., 2016b; Schenk et al., 2013).

117 For fossil-based calibrations of molecular clocks, it is crucial: (i) to properly assign and  
118 place fossils on the tree, and (ii) to correctly estimate the age of fossil-bearing formations  
119 (Parham et al., 2012; Sauquet et al., 2012). Unfortunately the fossil record of oldest murids is  
120 quite fragmentary and mostly consists of isolated teeth and mandible remains, thus sometimes  
121 making taxonomic identification difficult. The earliest representatives for the family Muridae  
122 include the tribe Myocricetodontini with genera such as †*Myocricetodon* Lavocat, †*Dakkamys*  
123 Jaeger and †*Mellalomys* Jaeger (Jacobs and Flynn, 2005; Lazzari et al., 2011). Extinct members  
124 of the genus †*Potwarmus* Lindsey could be considered as a stem group of the subfamily

125 Murinae based on detailed analyses of dental morphology (Lazzari et al., 2011; López  
126 Antoñanzas, 2009; Wessels, 2009). The earliest unequivocal representative of the subfamily  
127 Murinae is the genus †*Antemus* Jacobs (Jacobs and Downs, 1994; Jacobs and Flynn, 2005;  
128 Kimura et al., 2015). †*Antemus* possesses a new cusp (anterostyle, also known as t1), which is  
129 a synapomorphy of Murinae. The earliest record of †*Antemus chinjiensis* is dated at 13.8 Ma  
130 (Jacobs et al., 1990) based on specimens from the locality YGSP 491, Chinji Formation in the  
131 Potwar Plateau, Pakistan (Jacobs, 1977). In the fossil record of the Potwar Plateau, two more  
132 derived fossil genera are of particular interest: †*Karnimata* Jacobs and †*Progonomys* Schaub.  
133 Based on the relative position of the anterostyle to the lingual anterocone on M1, Jacobs (1978)  
134 hypothesized that †*Karnimata* is related to *Rattus* and that †*Progonomys* is a member of the  
135 lineage including *Mus*. Hence, their first stratigraphic occurrence has been used to define the  
136 widely used *Mus/Rattus* calibration (ca. 12 My; Jacobs and Downs, 1994). However, in 2015,  
137 Kimura et al. revisited these fossils from a paleontological perspective and proved this  
138 calibration point to be controversial. They showed that †*Karnimata* is a member of the  
139 Arvicanthini-Millardini-Otomyini clade rather than a member of the lineage encompassing the  
140 genus *Rattus* and its relatives (i.e. tribe Rattini). Therefore, they demonstrated that the  
141 continuous fossil record of the murine rodents from the Potwar Plateau actually provides a  
142 minimum age for the most recent common ancestor of the lineages leading to *Arvicanthis*  
143 Lesson and *Mus* (= *Mus/Arvicanthis* split).

144 Recent progresses in divergence dating analyses lead us to revisit results previously  
145 obtained by favouring the implementation of a new set of well-justified primary fossil  
146 calibrations within a Bayesian framework. In comparison to previous studies (listed above), our  
147 study can be considered as medium-sized in terms of taxonomic sampling, and essentially  
148 focused on the family Muridae. But our study stands out for rigorous evaluation of the fossil  
149 data for this highly diverse mammalian family. The present study has four main objectives: (i)

150 to design a comprehensive multi-marker molecular dataset for the family Muridae, (ii) to review  
151 the murid fossil record in order to identify reliable and suitable primary fossil calibrations, (iii)  
152 to provide a reliable estimate of the timing of diversification of the family using multiple fossil  
153 calibrations, and (iv) to lean on the resulting dated phylogeny to reconstruct the biogeographic  
154 history of the family using up-to-date analytical approaches.

155

## 156 **2. Material and Methods**

### 157 *2.1. Taxon sampling*

158 For this study, new DNA sequences were generated for five murid species (*Acomys* cf.  
159 *cineraceus*, *Acomys subspinosus* (Waterhouse), *Acomys wilsoni* Thomas, *Arvicanthis niloticus*  
160 (Desmarest), *Arvicanthis neumanni* (Matschie) see Appendix A). Though we largely relied on  
161 GenBank data for this work, it is worth underlining that our research group generated thousands  
162 of murid sequences (all deposited in GenBank) in the past 15 years (we used some of these  
163 sequences for 44 species included in this study). In total, our dataset (Appendix A) encompasses  
164 160 murid species representing 82 of the 151 known murid genera. All four extant subfamilies  
165 (if considering the Togo mouse from Leimacomyinae to be extinct) of Muridae are included.  
166 For the largest subfamily Murinae, we included representatives of all 10 tribes that have been  
167 defined by Lecompte et al. (2008): Apodemini, Arvicanthini, Hydromyini, Malacomyini,  
168 Millardini, Murini, Otomyini, Phloeomyini, Praomyini and Rattini. As outgroup taxa, we  
169 selected five species of the family Cricetidae (from subfamilies Arvicolinae, Cricetinae,  
170 Neotomyinae and Tylomyinae), which constitutes the sister group of Muridae (Fabre et al.,  
171 2012). Finally, the tree was rooted using *Calomyscus baluchi* Thomas, a representative of the  
172 more distant family Calomyscidae (Fabre et al., 2012). All species names followed Musser and  
173 Carleton (2005) and Monadjem et al. (2015).

174

175 2.2. DNA extraction, sequencing and molecular matrix

176 DNA was extracted using a Qiagen<sup>®</sup> DNeasy Blood and Tissue kit (Qiagen, Hilden,  
177 Germany) following the manufacturer's instructions. Two nuclear gene fragments were  
178 targeted using the following combinations of polymerase chain reactions (PCR) primers:  
179 IRBP217 and IRBP1531 (Stanhope et al., 1992) for the fragment of the 'interphotoreceptor  
180 retinoid binding' (IRBP) gene; RAG1F1705 and RAG1R2951 (Teeling et al., 2000) for a  
181 fragment of the 'recombination activating gene 1' (RAG1) gene. For PCR protocols, see Bryja  
182 et al. (2017) and Teeling et al. (2000), respectively. PCR products were Sanger sequenced in  
183 both directions using the BigDye<sup>®</sup> Terminator chemistry (Thermo Fisher Scientific) either in  
184 the Institute of Vertebrate Biology on an 'Applied Biosystems<sup>®</sup> 3130xl Genetic Analyzer', or  
185 commercially through the GATC Biotech company (Konstanz, Germany). New sequences were  
186 deposited in GenBank under accession numbers KY634246 to KY634250.

187 The newly generated sequences were further combined with data from GenBank. The  
188 resulting matrix (see Appendix A) encompasses the following six nuclear and nine  
189 mitochondrial gene fragments: 'acid phosphatase 5' (AP5), BRCA1, intronic portion of  
190 'Peripheral benzodiazapine receptor variant' (BZRP), 'growth hormone receptor' (GHR), IRBP  
191 and RAG1, for the nuclear genes, and '12S ribosomal RNA' (12S), '16S ribosomal RNA'  
192 (16S), 'ATP synthase 8' (ATPase8), 'cytochrome c oxidase I' (COI), 'cytochrome oxidase II'  
193 (COII), 'cytochrome *b*' (Cytb), 'Aspartic acid transfer RNA' (tRNA-Asp), 'Lysine transfer  
194 RNA' (tRNA-Lys), 'Serine transfer RNA' (tRNA-Ser), for the mitochondrial genes. For nine  
195 taxa (*Acomys* cf. *cineraceus*, *Acomys wilsoni* Thomas, *Aethomys chrysophilus* (de Winton),  
196 *Aethomys hindei* (Thomas), *Aethomys kaiseri* (Noack), *Aethomys silindensis* Roberts,  
197 *Arvicanthis nairobae* J.A. Allen, *Arvicanthis neumanni* and *Thallomys paedulus* (Sundevall),  
198 gene fragments were concatenated from two individuals to minimize the amount of missing  
199 data. For all protein-coding genes, we used Mesquite 3.2 (Maddison and Maddison, 2007) to

200 check the coding frame for possible errors or stop codons. The sequences of several markers  
201 (i.e. 12S, 16S, intronic portion of BZRP, tRNA-Asp, tRNA-Lys and tRNA-Ser) were variable  
202 in length; their alignment was accomplished using MUSCLE (Edgar, 2004) with default  
203 settings.

204

### 205 *2.3. Phylogenetic analyses*

206 Phylogenetic analyses were conducted using both Bayesian inference (BI) and  
207 maximum likelihood (ML). Analyses were performed on the online computer cluster CIPRES  
208 Science Gateway (Miller et al., 2010; [www.phylo.org](http://www.phylo.org)) and on the high performance computing  
209 (HPC) cluster hosted in the Centre de Biologie pour la Gestion des Populations (CBGP) in  
210 Montferrier-sur-Lez, France. For both phylogenetic analytical approaches, we carried out  
211 partitioned analyses to improve phylogenetic accuracy (Nylander et al., 2004). The molecular  
212 dataset was divided *a priori* into 33 partitions: we used three partitions for each of the protein-  
213 coding genes (AP5, ATPase8, BRCA1, COI, COII, Cytb, GHR, IRBP and RAG1) and one  
214 partition for each of the rRNA-tRNA genes (12S, 16S, tRNA-Asp, tRNA-Lys and tRNA-Ser)  
215 as well as the BZRP intronic portion. The best partitioning scheme and substitution models  
216 were determined with PartitionFinder 1.1.1 (Lanfear et al., 2014) using a greedy heuristic  
217 algorithm; because of the risk of over-parameterization associated with the high number of  
218 specified partitions, the ‘unlinked branch lengths’ option was chosen over the ‘linked branch  
219 lengths’ option. The Bayesian information criterion (BIC) was also preferentially used to  
220 compare partitioning schemes and substitution models following the recommendation of  
221 Ripplinger and Sullivan (2008).

222 PartitionFinder (based on BIC) identified the same three partitions for both BI and ML  
223 analyses: two partitions are associated with a Generalized-Time-Reversible (GTR + $\Gamma$  +I) model

224 and one partition is associated with a Hasegawa-Kishino-Yano (HKY + $\Gamma$  +I) model (see Table  
225 2).

226 Bayesian inference analyses were carried out using MrBayes v3.2.6 (Ronquist et al.,  
227 2012b). Two independent runs with four MCMC (one cold and three incrementally heated  
228 chains) were conducted: they ran for 50 million generations, with trees sampled every 1,000  
229 generations. A conservative 25% burn-in was applied after checking for stability on the log-  
230 likelihood curves and the split-frequencies of the runs. Support of nodes for MrBayes analyses  
231 was provided by clade posterior probabilities (PP) as directly estimated from the majority-rule  
232 consensus topology. Following Erixon et al. (2003), nodes supported by  $PP \geq 0.95$  were  
233 considered strongly supported.

234 Maximum likelihood analyses were performed using RAxML v8.2.8 (Stamatakis, 2014).  
235 Because this software does not allow simpler substitution models, we used three partitions with  
236 a General Time Reversible (GTR + $\Gamma$  +I) model (see Table 2). The best ML tree was obtained  
237 using heuristic searches with 100 random addition replicates. Clade support was then assessed  
238 using a non-parametric bootstrap procedure with 1,000 replicates. Following Hillis and Bull  
239 (1993), nodes supported by bootstrap values (BV)  $\geq 70$  were considered strongly supported.

240

#### 241 *2.4. Evaluation of suitable fossil calibrations*

242 Following the recommended criteria of Parham et al. (2012) for fossil calibrations, we  
243 rigorously compiled a list of potential candidates from the paleontological literature and  
244 eventually retained 18 candidate fossils (see Table 3). The candidate fossils possess the  
245 information for the collection site, unique identification number, and the state of preservation  
246 along with justification for the age of the fossil (i.e., age of fossil-bearing formation and  
247 stratigraphic level, preferably with an absolute age by radiometric dating and/or reliable relative  
248 age estimates, for example, by magnetostratigraphy).

249 In the next step, diagnostic morphological characters were reassessed to determine  
250 whether they could be reliably used as minimum age constraints in our phylogeny, either as  
251 crown or stem calibrations. Seven fossils were discarded following this step (see the ‘Results’  
252 section).

253 For the remaining 11 fossils, we used the cross-validation procedure developed by Near  
254 and Sanderson (2004) and Near et al. (2005). The following approach was used: (i) we  
255 identified potential inconsistencies within the 11 remaining fossil calibrations, and (ii) we  
256 explored the impact of the inclusion of each of these fossils on our divergence time estimates.  
257 Each of the 11 fossil constraints was enforced at a time in a specific Bayesian relaxed-clock  
258 (BRC) analysis to estimate the ages of the remaining nodes (see also section 2.5). First, the sum  
259 of the squared differences between the molecular and fossil age estimates (SS) was calculated  
260 (for more details see Near and Sanderson, 2004). All calibration points were then ranked based  
261 on the magnitude of its SS score; here the fossil with the greatest SS score is assumed to be the  
262 most inconsistent with respect to all other fossils in the analysis (Near and Sanderson, 2004).  
263 Second, we calculated the average squared deviation,  $s$ , for all fossil calibrations in the analysis.  
264 Following the method of Near et al. (2005), we removed the fossil with the greatest SS score  
265 and recalculated  $s$  with the remaining fossil calibration points. This process was pursued until  
266 only the two fossil calibration points with the lowest and second lowest magnitudes of SS  
267 remained (Near and Sanderson, 2004). The rationale behind this procedure is to assess whether  
268 calibration points are approximately equally informative and accurate (Near et al., 2005): if it  
269 is the case the magnitude of  $s$  should only decrease by a small fraction whenever a fossil  
270 calibration is removed.

271

272 *2.5. Bayesian relaxed-clock analyses*



273           Although divergence time dating is now a well-established cornerstone of evolutionary  
274 biology, there is still no widely accepted objective methodology for converting data from the  
275 fossil record to calibration information of use in molecular phylogenies (Drummond and  
276 Bouckaert, 2015). In the last few years, several methodological approaches to better implement  
277 fossil calibrations have been developed, for instance allowing one to directly include fossil  
278 lineages in phylogenies ('total-evidence dating'; Pyron, 2010; Ronquist et al. 2012a) or to  
279 account for information on the density of the fossil record ('fossilized birth-death (FBD)  
280 process'; Stadler, 2010; Heath et al., 2014). However, for our study, a 'total evidence dating'  
281 approach was not applicable since it would have required the coding of a morphological matrix  
282 for both fossils and extant taxa, which is problematic given the fragmentary nature of murid  
283 fossils. The use of the FBD methodology was also not envisioned because the fossil record of  
284 murid rodents is too sparse. Instead, we relied on a node-dating approach in which fossil  
285 information is enforced on specific nodes through the use of parametric distributions.

286           Following our assessment of the murid fossil record and the results of cross-validation  
287 analyses, nine fossil calibrations were finally retained for the dating procedure (for more  
288 information, see Tables 3 and 4, and Appendix B). Five of them were defined based on fossil  
289 material collected in the Siwalik Group of Pakistan (†*Antemus chinjiensis*, †*Karnimata darwini*  
290 Jacobs, †cf. *Karnimata* sp., †*Mus* sp. and †*Abudhabia pakistanensis* Flynn and Jacobs). Three  
291 additional accepted fossils originate from 6.1 Ma fossils discovered in the Lemudong'o locality  
292 in Kenya (†*Aethomys* sp., †*Arvicanthis* sp. and †*Gerbilliscus* sp.), and the last retained fossil  
293 calibration constraint is defined by the 9.6 Ma fossil of †*Parapodemus lungdunensis* Schaub.  
294 Priors for fossil constraints were defined by using either uniform or lognormal statistical  
295 distributions in two separate analyses. Statistical distributions were bounded by the minimum  
296 ages provided by the fossil constraints and a conservative maximum age (*ca.* 25 Ma) for the  
297 root derived from the study of Schenk et al. (2013; see Table 4). In a preliminary way (see



298 section 2.4 of the Material and Methods), BRC analyses were also conducted using one fossil  
299 constraint at a time to carry out cross-validation analyses.

300 Bayesian relaxed-clock analyses were conducted with BEAST v1.8.4 (Drummond et al.,  
301 2012) using uncorrelated lognormal relaxed clocks (Drummond et al., 2006). To limit the risk  
302 of over-parameterization: (i) we used three clock models (based on PartitionFinder results,  
303 Table 2); and (ii) we enforced a guide tree that corresponds to the topology with the best clade  
304 support (this topology corresponds to the topology obtained with MrBayes; see the ‘Results’  
305 section). For the tree speciation model, a birth death process (Gernhard, 2008) was used in order  
306 to better account for extinct and missing lineages.

307 BEAST .xml files were modified to implement the path-sampling procedure for Bayes  
308 factor ( $B_F$ ) estimation following the recommendations of Baele et al. (2013). Out of the two  
309 calibrations, the calibration procedure with lognormal prior has the best harmonic mean (-  
310 208117.74 *versus* -208262.58 for the procedure with a uniform prior) and is recovered as the  
311 best-fit calibration procedure with a statistically significant  $B_F$  of 289.68 ( $B_F > 10$ , Kass and  
312 Raftery, 1995). The final analysis (with nine verified fossil constraints and lognormal prior  
313 distribution for calibration constraints) was carried out by two independent runs each with 50  
314 million generations and trees sampled every 5,000 generations. We used a conservative burn-  
315 in of 12.5 million generations per run. Post burn-in trees from both analyses were further  
316 combined using the LogCombiner module of BEAST. Convergence of runs was assessed  
317 graphically under Tracer v.1.6 and by examining the ESS of parameters.

318

### 319 *2.6. Historical biogeography*

320 Ancestral biogeography was reconstructed using the R package ‘BioGeoBEARS’  
321 (Matzke, 2013). Data for species’ ranges were obtained from the International Union for  
322 Conservation of Nature website (<https://www.iucn.org/>). Five major biogeographic areas were

323 defined on the basis of Olson et al. (2001): A, West Palearctic (from Western Europe to the  
324 Ural Mountains, including North Africa); B, East Palearctic (from the Urals to Japan); C,  
325 Indomalaya (from Afghanistan through the Indian subcontinent and Southeast Asia to lowland  
326 southern China, and through Indonesia as far as Java, Bali, and Borneo, west of the Wallace  
327 line); D, Australasia (Australia, New-Zealand, Papua-New-Guinea and neighbouring small  
328 islands); E, Afrotropics (Africa, northern part excluded). Dispersal rate between adjacent areas  
329 was fixed to 1 (A-B; B-C), whereas the dispersal of 0.7 (A-E; C-D) and 0.3 (B-D; B-E) was  
330 specified for long-distance dispersal or whenever a geographical barrier had to be crossed.  
331 Dispersal was disallowed between geographical areas separated by two or more areas (A-D; D-  
332 E). Six models of geographic range evolution were compared in a likelihood framework: (i)  
333 Dispersal-Extinction Cladogenesis model (DEC) similar to Lagrange (Ree and Smith, 2008),  
334 which parameterizes dispersal and extinction; (ii) DEC +J model (Matzke, 2013; 2014), which  
335 adds founder-event speciation with long-distance dispersal (cladogenesis, where daughter  
336 lineage is allowed to jump to a new range outside the range of the ancestor; Matzke, 2013) to  
337 the DEC framework; (iii) Dispersal Vicariance Analysis (DIVA; Ronquist, 1997); (iv) DIVA  
338 with long-distance dispersal (DIVA +J; Matzke, 2013); (v) Bayesian inference of historical  
339 biogeography for discrete areas (BayArea; Landis et al., 2013); and (vi) BayArea with long-  
340 distance dispersal (BayArea +J; Matzke, 2013). Model fit was assessed using the Akaike  
341 information criterion (AIC) and likelihood-ratio tests (LRT).

342

### 343 **3. Results**

#### 344 *3.1. Phylogeny of Muridae*

345 Our multilocus dataset representing all major lineages of the family Muridae is 10,482 bp  
346 long with 42.5% missing data. Both BI and ML analyses yield similar topologies (see Fig. 1 for  
347 the topology inferred under BI, and Fig. S1 in Appendix D for the best-fit ML tree), as indicated

348 by a high proportion of shared nodes (160 out of 162). BI and ML analyses differ only in the  
349 position of *Pelomys fallax* (Peters) and *Zyzomys argurus* (Thomas), but their placements are  
350 not significantly supported in either analysis. Clade support is moderate to high on average; if  
351 considering the number of nodes that are supported by  $PP \geq 0.95$  or  $BV \geq 70\%$ , BI analyses  
352 yield a slightly more robust topology (135 well-supported nodes) compared to the ML tree (122  
353 well-supported nodes).

354 Phylogenetic analyses confirm the monophyly of the family Muridae, of all its four  
355 constituent subfamilies, as well as of the previously defined tribes of the subfamily Murinae  
356 (Fig. 1). On the contrary, the phylogenetic position of some genera (e.g. *Acomys* I. Geoffroy,  
357 *Dasymys* Peters, *Golunda* Gray, *Melomys* Thomas, *Micaelamys* Ellerman, *Pelomys* Peters,  
358 *Oenomys* Thomas and *Otomys* F. Cuvier) within particular tribes was only partly supported.

359

### 360 3.2. Evaluation of suitable fossil calibrations

361 We summarized all fossils considered in this study in Table 3 and Appendix B regarding  
362 taxonomic information and specification for prior settings (see also Figure 2 for their respective  
363 positions within the tree). Five out of 18 preselected fossils (i.e. †*Parapelomys robertsi* Jacobs,  
364 †*Potwarmus primitivus*, †*Preacomys kikiae* Geraads, †cf. *Progonomys* sp. Schaub and †aff.  
365 *Stenocephalomys* Frick) were excluded from further analyses because the scarcity of  
366 paleontological interpretation about their phylogenetic relationships impeded assigning them to  
367 specific nodes of the phylogeny (Appendix B). We also excluded fossils of *Acomys* and  
368 *Lemniscomys* Trouessart from the Lemudong'O locality, Kenya (Manthi, 2007), because first  
369 upper molars, which possess the most diagnostic characters in the murine dentition, are not  
370 described from the locality (Table 3; see more details also in Appendix B). The two-step cross-  
371 validation procedure resulted in a further reduction of the fossil set of possible calibration  
372 points. Specifically, we excluded two fossils: one is a 2.4 Ma fossil identified as the genus

373 *Gerbillus* Desmarest, while the other one corresponds to a 6.1 Ma fossil identified as the genus  
374 *Mastomys* Thomas (Appendix C). The rationale is that (i) these two fossil calibrations exhibited  
375 the largest magnitude of SS, and that (ii) their removal also resulted in a very high (fivefold)  
376 decrease in  $s$  (see Appendix C for more details). As a result of the latter series of selection steps,  
377 nine fossils were finally retained for divergence dating (see Figure 2 for their position on the  
378 tree, Table 4 for specification of priors, and Appendix B for more details on all considered  
379 fossils).

380

### 381 *3.3 Historical biogeography and divergence dating*

382 Among the six models of geographic-range evolution compared in a likelihood  
383 framework in BioGeoBEARS, the Dispersal-Extinction Cladogenesis model with founder-  
384 event speciation (DEC +J) was chosen because of its best likelihood and AICc associated scores  
385 ( $\ln L = -117.1$ ,  $AICc = 240.4$ ; Table 5).

386 The dated tree resulting from the BRC analyses is shown in Figure 2 while dating  
387 estimates for all internal nodes are provided in Table 6, and results of ancestral distribution  
388 reconstructions are presented in Figure 3. The most recent common ancestor (MRCA) of  
389 Muridae originated during the early Miocene (median age of 19.3 Ma; 95% highest posterior  
390 density (HPD): 17.06-21.92 Ma) in the Afrotropical and Indomalayan bioregions.

391 Three subfamilies (Deomyinae, Gerbillinae and Lophiomyinae) belonging to the same  
392 clade started their diversification in the Afrotropics. Within this clade, a first split occurred *ca.*  
393 18.6 Ma (95% HPD: 16.35-21.11 Ma) between the Lophiomyinae and the clade encompassing  
394 the Deomyinae and Gerbillinae. Deomyinae started their diversification *ca.* 14.6 Ma (95%  
395 HPD: 12.68-16.82 Ma) while Gerbillinae started theirs *ca.* 12.2 Ma (95% HPD: 10.46-14.16  
396 Ma). In Deomyinae and Gerbillinae, several lineages were able to colonize the Palearctic region

397 from the Afrotropics (in our dataset, this concerns *Acomys russatus* (Wagner) and *Gerbillus*  
398 *gerbillus* Olivier).

399 The subfamily Murinae originated in the Indomalayan region during the middle Miocene  
400 (median age of 14.2 Ma; 95% HPD: 12.70-16.07 Ma); the corresponding basal split separated  
401 the Phloeomyini and all remaining murines ('core murines' *sensu* Steppan et al. 2005). The  
402 next major split occurred in the Indomalaya between Rattini and the remaining tribes of  
403 Murinae (median age of 12.3 Ma; 95% HPD: 11.28-13.62 Ma), with an origin of Rattini  
404 estimated at 10.4 Ma (95% HPD: 9.23-11.93 Ma). The ancestral area of Rattini was also  
405 inferred to be the Indomalaya; during the course of their diversification, a few taxa colonized  
406 Australasia (e.g. *Bunomys andrewsi* (J.A. Allen), *Melasmothrix naso* Miller and Hollister,  
407 *Paruromys dominator* Thomas and *Rattus leucopus* (Gray)) as well as the West and East  
408 Palearctic (e.g. *Micromys minutus* (Pallas) and *Diplothrix legata* (Thomas)). The Hydromyini  
409 split from the remaining Murinae at *ca.* 11.9 Ma (95% HPD: 10.95-13.10 Ma); although basal  
410 lineages of this tribe are currently found in the Indomalaya (e.g. *Archboldomys luzonensis*  
411 Musser, *Apomys datae* (Meyer), *Apomys hylocoetes* Mearns, *Chrotomys gonzalesi* Rickart and  
412 Heaney, *Chiropodomys gliroides* (Blyth) and *Rhynchomys isarogensis* Musser and Freeman),  
413 a specific and diverse lineage of Hydromyini also colonized and radiated in the Australasia *ca.*  
414 8.1 Ma (95% HPD: 7.22-9.09 Ma). The clade gathering Apodemini, Malacomyini, Murini and  
415 Praomyini likely originated in the Afrotropics, with several lineages secondarily colonizing the  
416 Indomalaya and the West and East Palearctic. The split between Malacomyini (which remained  
417 in the Afrotropics) and Apodemini (which dispersed and differentiated mainly in the West and  
418 East Palearctic) is estimated at *ca.* 10.2 Ma (95% HPD: 9.33-11.39 Ma). Murini started to  
419 diversify in the Indomalaya at *ca.* 7.2 Ma (95% HPD: 6.24-9.29 Ma). The intense radiation (51  
420 extant species, Monadjem et al., 2015) of Praomyini occurred in the Afrotropics (median age  
421 of 6.8 Ma for the MRCA of Praomyini; 95% HPD: 6.06-7.77 Ma). The Indomalayan Millardini

422 split from the predominantly Afrotropical Arvicanthini + Otomyini tribes at *ca.* 10.8 Ma (95%  
423 HPD: 9.88-12.04 Ma). The respective first diversifications within Arvicanthini, Millardini and  
424 Otomyini are estimated at *ca.* 8.8 Ma (95% HPD: 7.92-9.72 Ma), 9.2 Ma (95% HPD: 7.72-  
425 10.75 Ma) and 4.9 Ma (95% HPD: 4.12-5.98 Ma), respectively. The position of Asian *Golunda*  
426 within Arvicanthini is not resolved (Fig. 1); the dispersal to Indomalaya of the lineage leading  
427 to the extant *Golunda* species at *ca.* 8.5 Ma (95% HPD: 7.33-9.57 Ma; as suggested in Fig. 3)  
428 should therefore be taken with caution.

## 429 **4. Discussion**

### 430 *4.1. Selection of taxa and molecular markers*

431 Our sampling of 160 species from 82 genera represents 22% of known murid species  
432 diversity and more than half of the generic diversity of the family Muridae. When one compares  
433 our sampling effort to previous studies (Table 7), only the study of Fabre et al. (2012) relied on  
434 a better sampling for the family Muridae (302 species from 105 genera, i.e. about 41% of known  
435 species diversity). In the study of Schenk et al. (2013), 18% of murid species are included. The  
436 number of sampled murid species is also lower in Lecompte et al. (2008) and Rowe et al. (2008)  
437 because their studies focussed on specific tribes and subfamilies.

438

### 439 *4.2. Calibration of molecular clock and divergence dating*

440 Using the classical *Mus/Rattus* calibration as prior for divergence dating often lead to an  
441 underestimation of the age of the subfamily Murinae, inferring median ages that are generally  
442 comprised between 13.3 to 12.0 Ma. Only the most recent studies (e.g. Rowe et al., 2016b) used  
443 the correct *Mus/Arvicanthis* calibration with a prior median age of 11.1 Ma (as suggested by  
444 Kimura et al., 2015). This resulted in the estimation of Murinae age of *ca.* 14.0 Ma (Rowe et  
445 al., 2016b), which is consistent with our study (Table 6).

446 Other fossils frequently used for molecular clock calibration are from the genus  
447 †*Parapodemus*. Recent studies used these fossils in two ways: the first occurrence of  
448 †*Parapodemus* sp. (Martín-Suárez and Mein, 1998) in the late Miocene in Europe (Lungu,  
449 1981; see Appendix B) was used to calibrate the MRCA of ‘Apodemurini’ (representing the  
450 split between Apodemini+Malacomyini and Murini+Praomyini; Fabre et al., 2013; Rowe et al.,  
451 2011). Another calibration point is based on the discovery of †*Parapodemus pasquierae*  
452 Aguilar and Michaux, from ‘Lo Fournas 6’ site (Roussillon, France). Authors postulated that  
453 the latter species and the smaller †*Parapodemus lugdunensis* co-occurred during the same time  
454 period ‘MN10’ (Aguilar et al., 1999; Montuire et al., 2006), dated approximately at 9.7 Ma  
455 (Mein, 2003). Michaux et al. (2002) considered the differences between these two species as  
456 representative of the split between the large *Apodemus mystacinus* Danford and Alston and all  
457 smaller *Apodemus* species from the subgenus *Sylvaemus*, but they used a younger age of 7.0  
458 Ma as a prior for their divergence. Numerous authors followed this calibration (e.g. Bryja et al.,  
459 2014; Fabre et al., 2013; Lecompte et al., 2008; Schenk et al., 2013) even if there is no clear  
460 rationale for it. The estimated dates of MRCA of Apodemini range from 7.5 Ma (Rowe et al.  
461 2016b; Schenk et al., 2013) to 9.6 Ma (Bryja et al., 2014; Michaux et al., 2002; Lecompte et  
462 al., 2008). In our study, we conservatively used the †*Parapodemus lugdunensis* fossil as a stem  
463 constraint for Apodemini and this placement resulted in an estimation of their MRCA at 9.0 Ma  
464 (95% HPD: 7.92-10.13 Ma).

465 There are several localities in Africa (e.g. Lukeino Formation, Winkler, 2002;  
466 Lemudong’o, Ambrose et al., 2007; Manthi, 2007) where fossil representatives of *Arvicanthis*  
467 were identified. These fossils were used for molecular clock calibration in several studies with  
468 a prior MRCA for the genus at 6.1 Ma (e.g. Fabre et al., 2013; Rowe et al., 2011). The fossils  
469 from Lemudong’o were also used, in a less conservative way, by Bryja et al. (2014): based on  
470 early records of †*Otomys* sp. (ca. 5.0 Ma; Denys, 1990), †*Aethomys* sp., †*Arvicanthis* sp.,



471 †*Lemniscomys* sp. (from Lemudong' o = 6.1 Ma; Ambrose et al., 2007; Manthi et al., 2007) and  
472 other relevant samples where these and related genera were absent (9.50-10.50 Ma; Mein et al.  
473 2004), they set the split between Arvicanthini and Otomyini within 6.08-9.54 Ma. This  
474 calibration resulted in an estimation of the MRCA for the tribe Arvicanthini at 7.8 Ma (Bryja  
475 et al., 2014), which is about 1 million year younger than our own estimate (Table 6). Rowe et  
476 al. (2016b) used as minimum age 8.7 Ma for the split between *Arvicanthis* and *Otomys* based  
477 on the study of Kimura et al. (2015) that set minimum and maximum ages for locality Y388,  
478 where †*Karnimata darwini* was found. This calibration resulted in an estimated MRCA of  
479 Arvicanthini at 8.5 Ma. In our study, we instead used the age of an older locality (Y182; median  
480 age of 9.2 Ma) where †*Karnimata darwini* was also found (Jacobs, 1978; Kimura et al., 2015),  
481 in order to set a crown calibration for the Arvicanthini/Millardini/Otomyini clade. This  
482 placement resulted in an estimation of their MRCA at 8.8 Ma (95% HPD: 7.92-9.72 Ma) (Table  
483 6).

484

#### 485 4.3. Historical biogeography with focus on faunal exchanges between the Afrotropics and 486 the Indomalaya

487 Our study could not resolve the origin of murid rodents, but it was either in the Afrotropics  
488 or in the Indomalaya. Our inferred ancestral tropical range for the MRCA of murids is consistent  
489 with the fact that most extant murid taxa are still distributed in warm and moist tropical areas.  
490 During the Early Miocene (23.0-16.0 Ma), the rotation of Africa and Arabia, and finally the  
491 collision with Eurasia formed a landbridge between Africa and Eurasia (the so-called  
492 ‘*Gomphotherium* landbridge’; Rögl, 1999). During this time period, early murids colonized  
493 both geographical regions. The subsequent reopening of the Mediterranean-Indo-Pacific  
494 seaway (‘Indo-Pacific recurrence’; Rögl, 1999) separated Africa from Eurasia again, thus  
495 giving rise to the main clades of Afrotropics and Indomalaya rodents. Three subfamilies,



496 Deomyinae, Gerbillinae and Lophiomyinae, then likely diversified in the Afrotropics (Chevret  
497 and Dobigny, 2005; Ndiaye et al., 2016; Schenk et al., 2013, this study; Figure 3). This  
498 hypothesis is supported by paleontological records since the oldest fossils tied to these  
499 subfamilies were found in the Afrotropics (e.g. late Miocene *Acomys*, *Gerbilliscus*, *Lophiomyis*  
500 and †*Preacomys* from East Africa; Winkler et al. 2010 and references therein). The subfamily  
501 Murinae started to diversify in Indomalaya, most probably in Southeast Asia, where we can  
502 also find the hitherto highest phylogenetic diversity, including the oldest offshoots of this clade  
503 (e.g. the ancestor of Phloeomyini probably lived in the Philippines, those of Rattini and  
504 Hydromyini in South-east Asia, etc.; Fabre et al., 2013).

505         During the Middle Miocene (16.0-11.6 Ma), the Mediterranean-Indo-Pacific seaway  
506 closed again at the beginning of the Serravallian *ca.* 13.8 Ma ('Parathethys Salinity Crisis';  
507 Rögl, 1999), co-incidentally with a global cooling that caused vegetation shifts and a general  
508 aridification (Prista et al., 2015). The newly formed landbridge (Rögl, 1999) allowed repeated  
509 dispersals of murine rodents from Asia to both Africa and Eurasia. Murine fossil records  
510 provide clear evidence for connections between the Indomalaya, the Palearctic, and the  
511 Afrotropics. Among them, there are two conspicuous examples: (i) †*Progonomys* was recorded  
512 in many Indomalayan Middle Miocene localities (Jacobs and Flynn, 2005) as well as in the  
513 Palearctic region (Algeria: Wessels, 2009; China: Qiu et al., 2004; Egypt: Heissig, 1982;  
514 France: Mein et al., 1993; Spain: Weerd, 1976); and (ii) the oldest records of †*Parapelomys*  
515 spp. were found synchronously in Africa (8.5 Ma; Chorora, Ethiopia; Geraads, 2001) and in  
516 Pakistan (*ca.* 8.0 Ma; Jacobs and Flynn, 2005). During this period, representatives of several  
517 murine tribes occurred in the Afrotropics (Arvicanthini, Malacomyini, Otomyini and  
518 Praomyini) and the Indomalaya (Millardini, Murini, Rattini, and basal lineages of Hydromyini).

519         The last faunal interchange of murid taxa between Africa, Asia and Western Palearctic  
520 (Benammi et al., 1996; Sabatier, 1982; Sen, 1977, 1983; Winkler, 2002) is coincident with

521 Messinian Salinity Crisis *ca.* 6 Ma during the Late Miocene (Hsü et al., 1973, 1978). During  
522 this period of global sea level depression (Haq et al., 1987) Africa and Arabia were reconnected  
523 through Neguev-Sinai landbridge ('Levantine corridor', Fernandes et al., 2006) and landbridge  
524 in the Bab-el-Mandeb (Bosworth et al., 2005). In murids, evidence to support this faunal  
525 exchange can be found in the African subgenus *Nannomys* (genus *Mus*), which colonized  
526 Afrotropics and started there its radiation *ca.* 5.2 Ma (Bryja et al., 2014). A possible example  
527 for an opposite west-to-east migration is the genus *Golunda*, which belongs to the Arvicanthini  
528 tribe. In a predominantly Afrotropical clade, *Golunda* is the only genus that occurs in the  
529 Indomalaya, probably since the end of Miocene (Ducroz et al., 2001; Fig. 3). However, one  
530 should be cautious with this scenario since the position of *Golunda* within Arvicanthini is not  
531 well supported (Fig. 1). Africa-to-Asia dispersals at the Miocene/Pliocene boundary have been  
532 also recorded in other taxa, such as rodents (e.g. *Myomyscus yemeni* (Sanborn and Hoogstraal);  
533 our unpubl. data), reptiles (e.g. *Varanus yemenensis*: Böhme et al., 2003, Portik and Papenfuss  
534 2012; *Hemidactylus* geckos: Šmíd et al. 2013; *Echis* vipers: Pook et al. 2009) and hamadryas  
535 baboons (Winney et al. 2004).

536

## 537 **5. Conclusion and perspectives**

538 In this study, we provided an improved multilocus dated phylogeny for the highly  
539 speciose family Muridae. Both our dating and historical biogeography analyses suggest that the  
540 family originated during the Early Miocene, and subsequently gave rise to four extant  
541 subfamilies: three in the Afrotropical region (Deomyinae, Gerbillinae and Lophiomyinae) and  
542 one in the Indomalaya (Murinae). Our study also supports a dynamic biogeographic scenario  
543 in which repeated colonisation events occurred in the Australasian (Hydromyini, Rattini),  
544 Afrotropical (Malacomyini, Praomyini, Arvicanthini, Otomyini) and Palearctic (Apodemini)  
545 regions. One of the strong aspects of this study lies in the assessment and treatment of fossil

546 data (Appendix B); such data is likely to be useful for further studies investigating the timing  
547 of diversification of rodents, or even mammals in general. For an easy access to all  
548 corresponding fossil records, we have made data available on the Date-a-Clade Website  
549 (<http://palaeo.gly.bris.ac.uk/fossilrecord2/dateaclade/index.html>), Paleobiology Database  
550 (<http://fossilworks.org/>) and TimeTree Database (<http://timetree.org>).

551

## 552 **Acknowledgments**

553 This study was supported by two projects of the Czech Science Foundation, no. 15-  
554 20229S, the Ministry of Culture of the Czech Republic (DKRVO 2017/15, National Museum,  
555 00023272) and JSPS KAKENHI JP15H06884 (Grant-in-Aid for Young Scientists Start-up).  
556 Most analyses were run on CBGP HPC computational platform, while a minor part was  
557 performed on CIPRES Gateway. We thank Alexandre Dehne Garcia for his help on the HPC  
558 CBGP cluster and Nick J. Matzke for introduction into BioGeoBEARS analysis. We would  
559 also like to thank Alisa Winkler and Christiane Denys for discussion about some  
560 paleontological aspects, as well as Arame Ndiaye and Pascal Chevret for providing additional  
561 sequences. We are grateful to Vincent Lazzari, Fredrick K. Manthi, Pierre Mein, Rajeev  
562 Pantanik and Sevket Sen who provided permission for the reproduction of the figures in  
563 Appendix B.

564

565 **Authors' contributions:** GJK, GD, LG, JB conceived the ideas; TA collected genetic  
566 data (including new genotyping); YK, TA collected and analysed paleontological data; TA,  
567 GJK performed phylogenetic analyses; TA, JB, GJK wrote the first version of the manuscript  
568 that was then implemented by all authors.

569

570           **References**

- 571   Adkins, R.M., Gelke, E.L., Rowe, D., Honeycutt, R.L., 2001. Molecular phylogeny and  
572           divergence time estimates for major rodent groups: evidence from multiple genes. *Mol.*  
573           *Biol. Evol.* 18, 777–91.
- 574   Adkins, R.M., Walton, A.H., Honeycutt, R.L., 2003. Higher-level systematics of rodents and  
575           divergence time estimates based on two congruent nuclear genes. *Mol. Phylogenet. Evol.*  
576           26, 409–420.
- 577   Aguilar, J.P., Escarguel, G., Michaux, J., 1999. A succession of Miocene rodent assemblages  
578           from fissure fillings in southern France: Palaeoenvironmental interpretation and  
579           comparison with Spain. *Palaeogeogr. Palaeoclimatol. Palaeoecol.* 145, 215–230.
- 580   Ameur, A., 1984. Découverte de nouveaux Rongeurs dans la formation miocène de Bou  
581           Hanifia (Algérie occidentale). *Géobios*, 17, 167-175.
- 582   Ambrose, S.H., Nyamai, C.M., Mathu, E.M., Williams, M.A.J., 2007. Geology, Geochemistry,  
583           and Stratigraphy of the Lemudong’o Formation, Kenya Rift Valley. *Kirtlandia*, Clevel.  
584           Museum Nat. Hist. 53–64.
- 585   Arbogast, B. S., Browne, R. A., Weigl, P. D., 2001. Evolutionary genetics and Pleistocene  
586           biogeography of North American tree squirrels (*Tamiasciurus*). *J. Mammal.* 82, 302-319.
- 587   Baele, G., Li, W.L.S., Drummond, A.J., Suchard, M. A., Lemey, P., 2013. Accurate model  
588           selection of relaxed molecular clocks in bayesian phylogenetics. *Mol. Biol. Evol.* 30, 239–  
589           43.
- 590   Benammi, M., Calvo, M., Prévot, M., Jaeger, J.-J., 1996. Magnetostratigraphy and  
591           paleontology of Ait Kandoula Basin (High Atlas, Morocco) and the African-European late  
592           Miocene terrestrial fauna exchanges. *Earth Planet. Sci. Lett.* 145, 15-29.
- 593   Bernor, R.L., Brunet M., Ginsburg, L., Mein, P., Pickford, M., Rögl, F., Sen, S., Steininger F.,  
594           Thomas, H., 1987. A consideration of some major topics concerning old world Miocene

- 595 mammalian chronology, migrations and paleogeography. *Geobios*. 20, 431-439.
- 596 Blanga-Kanfi, S., Miranda, H., Penn, O., Pupko, T., DeBry, R.W., Huchon, D., 2009. Rodent  
597 phylogeny revised: analysis of six nuclear genes from all major rodent clades. *BMC Evol.*  
598 *Biol.* 9, 71.
- 599 Bosworth, W., Huchon, P., McClay, K., 2005. The Red Sea and Gulf of Aden Basins. *J. Afr.*  
600 *Earth Sci.* 43, 334–378.
- 601 Böhme, W., 2003. Checklist of the living monitor lizards of the world (family Varanidae). *Zool.*  
602 *Verhandel.* 341, 1–43.
- 603 Bryja, J., Aghova, T., Bryjova, A., Denys, C., Verheyen, E., 2017. Evolutionary history of the  
604 thicket rats (genus *Grammomys*) mirrors the evolution of African forests since late  
605 Miocene. *J. Biogeogr.* 44, 182–194.
- 606 Bryja, J., Mikula, O.E., Umbera, R., Meheretu, Y., Aghová, T., Lavrenchenko, L. A, Mazoch,  
607 V., Oguge, N., Mbau, J.S., Welegerima, K., Amundala, N., Colyn, M., Leirs, H.,  
608 Verheyen, E., 2014. Pan-African phylogeny of *Mus* (subgenus *Nannomys*) reveals one of  
609 the most successful mammal radiations in Africa. *BMC Evol. Biol.* 14, 256.
- 610 Campisano, C.J., Feibel, C.S., 2008. Depositional environments and stratigraphic summary of  
611 the Pliocene Hadar formation at Hadar, Afar Depression, Ethiopia. in: Quade, J., Wynn,  
612 J.G. (Eds.), *The Geology of Early Humans in the Horn of Africa*. *Geol. Soc. Am.*, vol.  
613 446, pp. 179-201.
- 614 Carleton M.D., Musser G.G., 1984. Muroid rodents. in: Anderson S., Jones J.K., Jr., (Eds.),  
615 *Orders and families of recent mammals of the world*. Wiley, New York, pp. 289–379.
- 616 Chaline, J., 1977. Les rongeurs au pilori? Analyse critique des reconstitutions paléocéologiques  
617 en microthériodontologie. *Approche écologique de l’Homme fossile*. Paris, 77-81.
- 618 Cheema, I. U., S.Mahmood Raza, L. J. Flynn, A. R. Rapjar, Tomida, Y., 2000. Miocene  
619 smallmammals from Jalalpur, Pakistan, and their biochronologic implications. *Bull. Natl.*

- 620 Sci. Mus., Tokyo, C 26, 57–77.
- 621 Chevret, P., Denys, C., Jaeger, J.J., Michaux, J., Catzeflis, F.M., 1993a. Molecular evidence  
622 that the spiny mouse (*Acomys*) is more closely related to gerbils (Gerbillinae) than to true  
623 mice (Murinae). Proc. Natl. Acad. Sci. U.S.A. 90, 3433–3436.
- 624 Chevret, P., Denys, C., Jaeger, J.-J., Michaux, J., Catzeflis, F., 1993b. Molecular and  
625 palaeontological aspects of the tempo and mode of evolution in *Otomys* (Otomyinae:  
626 Muridae: Mammalia). Biochem. Syst. Ecol. 21, 123–131.
- 627 Chevret, P., Dobigny, G., 2005. Systematics and evolution of the subfamily Gerbillinae  
628 (Mammalia, Rodentia, Muridae). Mol. Phylogenet. Evol. 35, 674–688.
- 629 Daxner-Höck, G., 2003. *Cricetodon meini* and other rodents from the Mühlbach and Grund,  
630 Lower Austria (Middle Miocene, late MN5). Ann. Nat.hist. Mus. Wien (A) 104, 267-291.
- 631 DeBry, R.W., 2003. Identifying conflicting signal in a multigene analysis reveals a highly  
632 resolved tree: the phylogeny of Rodentia (Mammalia). Syst. Biol. 52, 604–617.
- 633 Deino, A.L., Ambrose, S.H., 2007. <sup>40</sup>Ar/<sup>39</sup>Ar dating of the Lemudong'o late Miocene fossil  
634 assemblages, southern Kenya rift. Kirtlandia. 56, 65–71.
- 635 Denys, C., 1990. The oldest *Acomys* (Rodentia, Muridae) from the lower Pliocene of South  
636 Africa and the problem of its murid affinities. Paleontogr. Abt. A, 210, 79–91.
- 637 Denys, C., Michaux, J., Catzeflis, F., Ducroq, S., Chevret, P., 1995. Morphological and  
638 molecular data against the monophyly of Dendromurinae (Muridae:Rodentia). Bönner  
639 Zool. Beitr. 45, 173–190.
- 640 Dobigny, G., Tatard, C., Gauthier, P., Ba, K., Duplantier, J., Granjon, L., Kergoat, G.J., 2013.  
641 Mitochondrial and Nuclear Genes-Based Phylogeography of *Arvicanthis niloticus*  
642 (Murinae) and Sub-Saharan Open Habitats Pleistocene History. PLoS One 8.
- 643 Donoghue, P. C., Benton, M. J., 2007. Rocks and clocks: calibrating the Tree of Life using  
644 fossils and molecules. Trends Ecol. Evol. 22, 424-431.

- 645 Drummond, A.J., Bouckaert, R.R., 2015. Bayesian evolutionary analysis with BEAST 2.  
646 Cambridge University press.
- 647 Drummond, A.J., Ho, S.Y.W., Phillips, M.J., Rambaut, A., 2006. Relaxed phylogenetics and  
648 dating with confidence. *PLoS Biol.* 4, e88.
- 649 Drummond, A. J., Suchard, M. A., Xie, D., Rambaut, A. 2012. Bayesian phylogenetics with  
650 BEAUti and the BEAST 1.7. *Mol. Biol. Evol.* 29, 1969-1973.
- 651 Ducroz, J.F., Volobouev, V., Granjon, L., 2001. An Assessment of the Systematics of  
652 Arvicanthine Rodents Using Mitochondrial DNA Sequences: Evolutionary and  
653 Biogeographical Implications *J. Mammal. Evol.* 8, 173-206.
- 654 Edgar, R.C., 2004. MUSCLE: multiple sequence alignment with high accuracy and high  
655 throughput. *Nucleic Acids Res.* 32, 1792–7.
- 656 Erixon, P., Svennblad, B., Britton, T., Oxelman, B., 2003. Reliability of Bayesian posterior  
657 probabilities and bootstrap frequencies in phylogenetics. *Syst. Biol.* 52, 665–673.
- 658 Fabre, P.H., Hautier, L., Dimitrov, D., Douzery, E.J., 2012. A glimpse on the pattern of rodent  
659 diversification: a phylogenetic approach. *BMC evolutionary biology*, 12(1), 88.
- 660 Fabre, P.H., Pagès, M., Musser, G.G., Fitriana, Y.S., Fjeldså, J., Jennings, A., Jönsson, K. A.,  
661 Kennedy, J., Michaux, J., Semiadi, G., Supriatna, N., Helgen, K.M., 2013. A new genus  
662 of rodent from wallacea (Rodentia: Muridae: Murinae: Rattini), and its implication for  
663 biogeography and Indo-Pacific Rattini systematics. *Zool. J. Linn. Soc.* 169, 408–447.
- 664 Fernandes, C.A., Rohling, E.J., Siddall, M., 2006. Absence of post-Miocene Red Sea land  
665 bridges: Biogeographic implications. *J. Biogeogr.* 33, 961–966.
- 666 Flynn, L.J., Jacobs, L.L., 1999. Late Miocene small mammal faunal dynamics: the crossroads  
667 of the Arabian peninsula. in: Whybrow, P.J., Hill, A., (Eds.), *Fossil vertebrates of Arabia*.  
668 Yale University Press, New Haven, pp. 412–419.
- 669 Gavryushkina, A., Heath, T. A., Ksepka, D. T., Stadler, T., Welch, D., Drummond, A. J., 2017.

- 670 Bayesian total-evidence dating reveals the recent crown radiation of penguins. *Syst.*  
671 *Biol.* 66, 57-73.
- 672 Geraads, D., 2001. Rongeurs du Miocene superieur de Chorora (Ethiopie): Dendromuridae,  
673 Muridae et conclusions. *Palaeovertebrata.* 30, 89–109.
- 674 Geraads, D., Alemseged, Z., Bellon, H., 2002. The late Miocene mammalian fauna of Chorora,  
675 Awash basin, Ethiopia: systematics, biochronology and the 40K–40Ar ages of the  
676 associated volcanics. *Tertiary Research.* 21, 113–127.
- 677 Gernhard, T., 2008. The conditioned reconstructed process. *J. Theor. Biol.* 253, 769–778.
- 678 Granjon, L., Colangelo, P., Tatard, C., Colyn, M., Dobigny, G., Nicolas, V., 2012. Intrageneric  
679 relationships within *Gerbilliscus* (Rodentia, Muridae, Gerbillinae), with characterization  
680 of an additional West African species. *Zootaxa.* 25, 1–25.
- 681 Granjon, L., Montgelard, C., 2012. The Input of DNA Sequences to Animal Systematics:  
682 Rodents as Study Cases. in: Munshi, A. (Ed.), *DNA Sequencing - Methods and*  
683 *Applications*, InTech, pp. 104-140.
- 684 Haq, B.U., Hardenbol, J., Vail, P.R., 1987. Chronology of fluctuating sea levels since the  
685 Triassic. *Science.* 235, 1156-1167.
- 686 Heath, T. A., Huelsenbeck, J.P., Stadler, T., 2014. The fossilized birth-death process for  
687 coherent calibration of divergence-time estimates. *Proc. Natl. Acad. Sci. U.S.A.* 111,  
688 E2957-66.
- 689 Heissig, K., 1982. Kleinsäuger aus einer obermiozänen (Vallesium) Karstfüllung Ägyptens.  
690 *Mitt. Bayer. Staatssamml. Paläontol. Hist. Geol.* 22, 97-101.
- 691 Hillis, D.M., Bull, J.J., 1993. An empirical test of bootstrapping as a method for assessing  
692 confidence in phylogenetic analysis. *Syst. Biol.* 42, 182–192.
- 693 Hsü, K.J., 1978. Stratigraphy of the lacustrine sedimentation in the Black Sea. Initial Reports  
694 of the DSDP. 42B, 509–524.



- 695 Hsü, K.J., Cita, M.B., Ryan, W.B.F., 1973. The origin of the Mediterranean evaporites. Initial  
696 Reports of the DSDP. 42, 1203–1231.
- 697 Jacobs, L. L. 1977. A new genus of murid rodent from the miocene of Pakistan and comments  
698 on the origin of the Muridae. *PaleoBios*. 25, 1–11
- 699 Jacobs, L. L., 1978. Fossil rodents (Rhizomyidae and Muridae) from Neogene Siwalk deposits,  
700 Pakistan. *Mus. North. Ariz. Bull.* 52, 1–103.
- 701 Jacobs, L.L., Downs, W.R., 1994. The evolution of murine rodents in Asia. *Natl. Sci. Museum*  
702 *Monogr.* 8, 149–156.
- 703 Jacobs, L. L., Flynn, L.J., Downs, W.R., 1989. Neogene Rodentia of Southern Asia. in: Black,  
704 C.C., Dawson, M.R. (Eds.), *Papers on fossil rodents in honor of Albert Elmer Wood*.  
705 *Natural History Museum, Los Angeles County, Science Series No. 33*, pp. 157–177.
- 706 Jacobs, L., Flynn, L., Downs, W., Barry, J., 1990. Quo vadis Antemus? The Siwalik muroid  
707 record. in: Lindsay, E.H, Fahlbusch, V., Mein, P. (Eds.), *European Neogene Mammal*  
708 *Chronology*. Plenum Press. New York. pp. 573–586.
- 709 Jacobs L.L., Flynn J.J., 2005. Of mice ... again: the Siwalik rodent record, murine distribution,  
710 and molecular clocks. in: Leiberman. D.E., Smith, R.J., Kelley, J., (Eds.), *Interpreting the*  
711 *past: essays on human, primate, and mammal evolution in honor of David Pilbeam*. Brill  
712 *Academic Publishers Inc, Boston*. pp. 63–80.
- 713 Jaeger, J.-J., 1977. Les rongeurs du Miocène moyen et supérieur du Maghreb. *Palaeovertebrata*.  
714 8, 3–166.
- 715 Jansa, S. A, Weksler, M., 2004. Phylogeny of muroid rodents: relationships within and among  
716 major lineages as determined by IRBP gene sequences. *Mol. Phylogenet. Evol.* 31, 256–  
717 76.
- 718 Kass, R. E., Raftery, A. E., 1995. Bayes factors. *J. Am. Stat. Assoc.* 90, 773-795.
- 719 Kimbel, W., Walter, R., Johanson, D., Reed, K., Aronson, J., Assefa, Z., Marean, C.W., Eck,

- 720 G., Bobe, R., Hovers, E., Rak, Y., Vondra, C., Yemane, T., York, D., Chen, Y., Evensen,  
721 N., Smith, P., 1996. Late Pliocene Homo and Oldowan tools from the Hadar formation  
722 (Kada Hadar member), Ethiopia. *J. Hum. Evol.* 31, 549-561.
- 723 Kimura, Y., Hawkins, M.T.R., McDonough, M.M., Jacobs, L.L., Flynn, L.J., 2015. Corrected  
724 placement of *Mus-Rattus* fossil calibration forces precision in the molecular tree of  
725 rodents. *Nat. Publ. Gr.* 1–9.
- 726 Kimura, Y., Jacobs, L.L., Cerling, T.E., Uno, K.T., Ferguson, K.M., Flynn, L.J., Patnaik, R.,  
727 2013. Fossil Mice and Rats Show Isotopic Evidence of Niche Partitioning and Change in  
728 Dental Ecomorphology Related to Dietary Shift in Late Miocene of Pakistan. *PLoS One*  
729 8, 1–10.
- 730 Kingdon, J., 2015. *The Kingdon field guide to African mammals*. Bloomsbury Publishing,  
731 London.
- 732 Lavocat, R., 1978. Rodentia and Lagomorpha. in: Maglio, V.J., Cooke, H.B.S. (Eds.), *Evolution*  
733 *of African mammals*. Harvard University Press, Cambridge. pp. 68-89.
- 734 Landis, M.J., Matzke, N.J., Moore, B.R., Huelsenbeck, J.P., 2013. Bayesian analysis of  
735 biogeography when the number of areas is large. *Syst. Biol.* 62, 789–804.
- 736 Lanfear, R., Calcott, B., Kainer, D., Mayer, C., Stamatakis, A., 2014. Selecting optimal  
737 partitioning schemes for phylogenomic datasets. *BMC Evol. Biol.* 14, 82.
- 738 Lazzari, V., Tafforeau, P., Michaux, J., 2011. When homologous cusps display non-  
739 homologous wear facets: An occlusal reorganization ensures functional continuity during  
740 dental evolution of Murinae (Rodentia, Mammalia). *Arch. Oral Biol.* 56, 194–204.
- 741 Lecompte, E., Aplin, K., Denys, C., Catzeflis, F., Chades, M., Chevret, P., 2008. Phylogeny  
742 and biogeography of African Murinae based on mitochondrial and nuclear gene sequences,  
743 with a new tribal classification of the subfamily. *BMC Evol. Biol.* 8, 199.
- 744 Lindsay, E.H., 1988. Cricetid Rodents from Siwalik Deposits near Chinji Village. Part 1:

- 745 Megacricetodontinae, Myocricetodontinae and Dendromurinae. *Palaeovertebrata*. 18, 95-  
746 154.
- 747 López Antoñanzas, R., 2009. First potwarmus from the miocene of Saudi Arabia and the early  
748 phylogeny of murines (Rodentia: Muroidea). *Zool. J. Linn. Soc.* 156, 664–679.
- 749 Lungu, A. N., 1981. Hipparion Fauna of Middle Sarmatian of Moldavia (Insectivora,  
750 Lagomorpha and Rodentia). State Tiraspol Institut Pedagogiki Publ. 1557, 1-137.
- 751 Maddison, W. P. and Maddison, D.R., 2017. Mesquite: a modular system for evolutionary  
752 analysis. Version 3.2 <http://mesquiteproject.org>
- 753 Macholán, M., 2012, (Ed.), Evolution of the house mouse (No. 3). Cambridge University Press.
- 754 Manthi, F.K., 2007. A preliminary review of the rodent fauna from Lemudong'o, southwestern  
755 Kenya, and its implication to the late Miocene paleoenvironments. *Kirtlandia*. 56, 92–105.
- 756 Martín-Suárez, E., Mein, P., 1998. Revision of the genera *Parapodemus*, *Apodemus* *Rhagamys*  
757 and *Rhagapodemus* (Rodentia, Mammalia). *Geobios*. 31, 87–97.
- 758 Matzke, N.J., 2013. Probabilistic historical biogeography: new models for founder-event  
759 speciation, imperfect detection, and fossils allow improved accuracy and model-testing.  
760 *Berkeley Plan. J.* 26, 217–220.
- 761 Matzke, N.J., 2014. Model selection in historical biogeography reveals that founder-event  
762 speciation is a crucial process in island clades. *Syst. Biol.* 63, 951–970.
- 763 Mein, P., Martín-Suárez, E., Agustí, J. 1993. *Progonomys* Schaub, 1938 and *Huerzelerimys*  
764 gen. nov.(Rodentia); their evolution in Western Europe. *Scripta Geol.* 103, 41-64.
- 765 Mein, P., 2003. On Neogene rodents of Eurasia: distributions and migrations - in: Reumer,  
766 J.W.F., Wessels, W. (Eds.), *Distribution and migration of Tertiary mammals in Eurasia*.  
767 A volume in honour of Hans de Bruijn. *Natuurmuseum Rotterdam*. pp. 407-418.
- 768 Mein, P., Pickford, M., Senut, B., 2004. Late Miocene micromammals from the Harasib karst  
769 deposits, Namibia. Part 2b-Cricetomyidae, Dendromuridae and Muridae, with an

- 770 addendum on the Myocricetodontinae. *Communs. Geol. Surv. Namibia*. 13, 43–63.
- 771 Michaux, J. R., Chevret, P., Filippucci, M. G., Macholán, M., 2002. Phylogeny of the genus  
772 *Apodemus* with a special emphasis on the subgenus *Sylvaemus* using the nuclear IRBP  
773 gene and two mitochondrial markers: cytochrome b and 12S rRNA. *Mol. Phylogenet.*  
774 *Evol.* 23, 123-136.
- 775 Michaux, J., Chevret, P., Renaud, S., 2007. Morphological diversity of Old World rats and mice  
776 (Rodentia, Muridae) mandible in relation with phylogeny and adaptation. *J. Zool. Syst.*  
777 *Evol. Res.* 45 (3), 263-279.
- 778 Miller, M.A., Pfeiffer, W., Schwartz, T., 2010. Creating the CIPRES Science Gateway for  
779 inference of large phylogenetic trees, in: 2010 Gateway Computing Environments  
780 Workshop, GCE 2010. pp. 1–8.
- 781 Monadjem, A., Taylor, P. J., Denys, C., Cotterill, F. P., 2015. Rodents of sub-Saharan Africa:  
782 a biogeographic and taxonomic synthesis. Walter de Gruyter GmbH,  
783 Berlin/Munich/Boston.
- 784 Montgelard, C., Forty, E., Arnal, V., Matthee, C. A., 2008. Suprafamilial relationships among  
785 Rodentia and the phylogenetic effect of removing fast-evolving nucleotides in  
786 mitochondrial, exon and intron fragments. *BMC Evol. Biol.* 8, 321.
- 787 Montuire, S., Maridet, O., Legendre, S., 2006. Late Miocene–Early Pliocene temperature  
788 estimates in Europe using rodents. *Palaeogeogr. Palaeoclimatol. Palaeoecol.* 238, 247-262.
- 789 Munthe, J., 1987. Small-mammal fossils from the Pliocene Sahabi Formation of Libya. in:  
790 Boaz, N.T., El-Arnauti, A., Gaziry, A.W, de Heinzelin, J., Boaz, D.D, (Eds.), *Neogene*  
791 *Paleontology and Geology of Sahabi*, Alan R. Liss. New York. pp. 135–144.
- 792 Musser, G.G., Carleton M.D., 2005. Superfamily Muroidea, in: Wilson, D.E., Reeder, D.A.M.  
793 (Eds.), *Mammal Species of the World. A Taxonomic and Geographic Reference*. The  
794 Johns Hopkins University Press. Baltimore. pp. 894–1531.

- 795 Ndiaye, A., Chevret, P., Dobigny, G., Granjon, L., 2016. Evolutionary systematics and  
796 biogeography of the arid habitat-adapted rodent genus *Gerbillus* (Rodentia, Muridae): a  
797 mostly Plio-Pleistocene African history. *J. Zool. Syst. Evol. Res.* 54, 299-317.
- 798 Near, T.J., Meylan, P. A., Shaffer, H.B., 2005. Assessing concordance of fossil calibration  
799 points in molecular clock studies: an example using turtles. *Am. Nat.* 165, 137–146.
- 800 Near, T.J., Sanderson, M.J., 2004. Assessing the quality of molecular divergence time estimates  
801 by fossil calibrations and fossil-based model selection. *Philos. Trans. R. Soc. Lond. B.*  
802 *Biol. Sci.* 359, 1477–1483.
- 803 Nicolas, V., Mboumba, J.F., Verheyen, E., Denys, C., Lecompte, E., Olayemi, A., Missoup,  
804 A.D., Katuala, P., Colyn, M., 2008. Phylogeographic structure and regional history of  
805 *Lemniscomys striatus* (Rodentia: Muridae) in tropical Africa. *J. Biogeogr.* 35, 2074–2089.
- 806 Nylander, J.A.A., Ronquist, F., Huelsenbeck, J.P., Nieves-Aldrey, J.L., 2004. Bayesian  
807 Phylogenetic Analysis of Combined Data. *Syst. Biol.* 53, 47–67.
- 808 Ogg, J. G., Smith, A. G., 2004. Geologic Time Scale 2004. in: Gradstein, F. M., Ogg, J. G.,  
809 Smith, A. G.A (Eds.), Cambridge University Press. pp. 63–86.
- 810 Olson, D.M., Dinerstein, E., Wikramanayake, E.D., Burgess, N.D., Powell, G.V.N.,  
811 Underwood, E.C., D’amico, J. A., Itoua, I., Strand, H.E., Morrison, J.C., Loucks, C.J.,  
812 Allnutt, T.F., Ricketts, T.H., Kura, Y., Lamoreux, J.F., Wettengel, W.W., Hedao, P.,  
813 Kassem, K.R., 2001. Terrestrial Ecoregions of the World: A New Map of Life on Earth.  
814 *Bioscience* 51, 933.
- 815 Pagès, M., Fabre, P.-H., Chaval, Y., Mortelliti, A., Nicolas, V., Wells, K., Michaux, J.R.,  
816 Lazzari, V., 2016. Molecular phylogeny of Southeast Asian arboreal murine rodents. *Zool.*  
817 *Scr.* 45, 349-364.
- 818 Parham, J.F., Donoghue, P.C.J., Bell, C.J., Calway, T.D., Head, J.J., Holroyd, P. A., Inoue,  
819 J.G., Irmis, R.B., Joyce, W.G., Ksepka, D.T., Patané, J.S.L., Smith, N.D., Tarver, J.E.,

- 820 Van Tuinen, M., Yang, Z., Angielczyk, K.D., Greenwood, J.M., Hipsley, C. A., Jacobs,  
821 L., Makovicky, P.J., Müller, J., Smith, K.T., Theodor, J.M., Warnock, R.C.M., Benton,  
822 M.J., 2012. Best practices for justifying fossil calibrations. *Syst. Biol.* 61, 346–359.
- 823 Pook, C. E., Joger, U., Stümpel, N., Wüster, W., 2009. When continents collide: phylogeny,  
824 historical biogeography and systematics of the medically important viper genus *Echis*  
825 (*Squamata: Serpentes: Viperidae*). *Mol. Phylogenet. Evol.* 53, 792-807.
- 826 Portik, D. M., Papenfuss, T. J., 2012. Monitors cross the Red Sea: the biogeographic history  
827 of *Varanus yemenensis*. *Mol. Phylogenet. Evol.* 62, 561-565.
- 828 Prista, G.A., Agostinho, R.J., Cachão, M.A., 2015. Observing the past to better understand the  
829 future: A synthesis of the Neogene climate in Europe and its perspectives on present  
830 climate change. *Open Geosci.* 7, 65–83.
- 831 Pyron, R.A., 2010. A likelihood method for assessing molecular divergence time estimates and  
832 the placement of fossil calibrations. *Syst. Biol.* 59, 185–194.
- 833 Qiu, Z., Zheng, S., Zhang, Z., 2004. Murids from the late Miocene Bahe formation, Lantian,  
834 Shaanxi. *Vertebrata Pal. Asiatica*, 42, 67-76.
- 835 Ree, R.H., Smith, S. A., 2008. Maximum likelihood inference of geographic range evolution  
836 by dispersal, local extinction, and cladogenesis. *Syst. Biol.* 57, 4–14.
- 837 Reed, D. N., 2011. New murid (*Mammalia, Rodentia*) fossils from a late Pliocene (2.4 Ma)  
838 locality, Hadar A. L. 894, Afar Region, Ethiopia. *J. Vert. Paleontol.* 31, 1326–1337.
- 839 Renaud, S., Michaux, J., Mein, P., Aguilar, J.P., Auffray, J.C., 1999. Patterns of size and shape  
840 differentiation during the evolutionary radiation of the European Miocene murine rodents.  
841 *Lethaia* 32, 61–71.
- 842 Ripplinger, J., Sullivan, J., 2008. Does choice in model selection affect maximum likelihood  
843 analysis? *Syst. Biol.* 57, 76–85.
- 844 Ronquist, F., 1997. Dispersal-Vicariance Analysis: A New Approach to the Quantification of

- 845 Historical Biogeography. *Syst. Biol.* 46, 195.
- 846 Ronquist, F., Klopfstein, S., Vilhelmsen, L., Schulmeister, S., Murray, D.L., Rasnitsyn, A.P.,  
847 2012a. A total-evidence approach to dating with fossils, applied to the early radiation of  
848 the hymenoptera. *Syst. Biol.* 61, 973–999.
- 849 Ronquist, F., Teslenko, M., van der Mark, P., Ayres, D.L., Darling, A., Höhna, S., Larget, B.,  
850 Liu, L., Suchard, M. A, Huelsenbeck, J.P., 2012b. MrBayes 3.2: efficient Bayesian  
851 phylogenetic inference and model choice across a large model space. *Syst. Biol.* 61, 539–  
852 42.
- 853 Rowe, K.C., Achmadi, A.S., Esselstyn, J.A., 2016a. A new genus and species of omnivorous  
854 rodent (Muridae: Murinae) from Sulawesi, nested within a clade of endemic carnivores. *J.*  
855 *Mammal.* 97, 978-991.
- 856 Rowe, K.C., Achmadi, A.S., Esselstyn, J.A., 2016b. Repeated evolution of carnivory among  
857 Indo-Australian rodents. *Evolution.* 70, 653-665.
- 858 Rowe, K.C., Aplin, K.P., Baverstock, P.R., Moritz, C., 2011. Recent and rapid speciation with  
859 limited morphological disparity in the genus *rattus*. *Syst. Biol.* 60, 188–203.
- 860 Rowe, K.C., Reno, M.L., Richmond, D.M., Adkins, R.M., Stepan, S.J., 2008. Pliocene  
861 colonization and adaptive radiations in Australia and New Guinea (Sahul): Multilocus  
862 systematics of the old endemic rodents (Muroidea: Murinae). *Mol. Phylogenet. Evol.* 47,  
863 84–101.
- 864 Rögl, F., 1999. Mediterranean and Paratethys. Facts and hypotheses of an Oligocene to  
865 Miocene paleogeography (short overview). *Geol. Carpathica.* 50, 339–349.
- 866 Sabatier, M., 1982. Les rongeurs du site Pliocène à Hominidés de Hadar (Ethiopie).  
867 *Palaeovertebrata.* 12. 1–56.
- 868 Sauquet, H., Ho, S.Y.W., Gandolfo, M.A., Jordan, G.J., Wilf, P., Cantrill, D.J., Bayly, M.J.,  
869 Bromham, L., Brown, G.K., Carpenter, R.J., Lee, D.M., Murphy, D.J., Sniderman, J.M.K.,

- 870 Udovicic, F., 2012. Testing the impact of calibration on molecular divergence times using  
871 a fossil-rich group: The case of nothofagus (Fagales). *Syst. Biol.* 61, 289–313.
- 872 Sen, S. 1977. La faune de rongeurs Pliocenes de Calta (Ankara, Turquie). *Bull. Mus. Natl. Hist.*  
873 *Nat. Sci. Terre.* 465, 1–171.
- 874 Sen, S., 1983. Rongeurs et lagomorphes du gisement pliocène de Pul-e Charkhi, bassin de  
875 Kabul, Afghanistan. *Bull. Mus. Natl. Hist. Nat.* 5, 33-74.
- 876 Schenk, J. J., Rowe, K. C., Steppan, S. J., 2013. Ecological opportunity and incumbency in the  
877 diversification of repeated continental colonizations by muroid rodents. *Syst. Biol.* 62,  
878 837-864.
- 879 Simpson, G. G., 1945. The principles of classification and a new classification of mammals.  
880 *Bull. Am. Mus. Nat. Hist.* 85, 1–350.
- 881 Stadler, T., 2010. Sampling-through-time in birth-death trees. *J. Theor. Biol.* 267, 396–404.
- 882 Stamatakis, A., 2014. RAxML version 8 a tool for phylogenetic analysis and post-analysis of  
883 large phylogenies. *Bioinformatics.* 30, 1312-1313.
- 884 Stanhope, M. J., Czelusniak, J., Si, J. S., Nickerson, J., Goodman, M., 1992. A molecular  
885 perspective on mammalian evolution from the gene encoding interphotoreceptor retinoid  
886 binding protein, with convincing evidence for bat monophyly. *Mol. Phylogenet. Evol.* 1,  
887 148-160.
- 888 Steppan, S., Adkins, R., Anderson, J., 2004. Phylogeny and divergence-date estimates of rapid  
889 radiations in muroid rodents based on multiple nuclear genes. *Syst. Biol.* 53, 533–553.
- 890 Steppan, S.J., Adkins, R.M., Spinks, P.Q., Hale, C., 2005. Multigene phylogeny of the Old  
891 World mice, Murinae, reveals distinct geographic lineages and the declining utility of  
892 mitochondrial genes compared to nuclear genes. *Mol. Phylogenet. Evol.* 37, 370–88.
- 893 Suwa, G., Beyene, Y., Nakaya, H., Bernor, R. L., Boisserie, J. R., Bibi, F., ... & Asfaw, B. 2015.  
894 Newly discovered cercopithecoid, equid and other mammalian fossils from the Chorora



- 895 Formation, Ethiopia. *J. Anthropol. Sci.* 123, 19-39.
- 896 Šmíd, J., Carranza, S., Kratochvíl, L., Gvoždík, V., Nasher, A.K., Moravec, J., 2013. Out of  
897 Arabia: a complex biogeographic history of multiple vicariance and dispersal events in the  
898 gecko genus *Hemidactylus* (Reptilia: Gekkonidae). *PLoS One.* 8, e64018.
- 899 Teeling, E.C., Scally, M., Kao, D.J., Romagnoli, M.L., Springer, M.S., Stanhope, M.J., 2000.  
900 Molecular evidence regarding the origin of echolocation and flight in bats. *Nature*, 403,  
901 188–192.
- 902 Vangengeim, E.A., Lungu, A.N., Tesakov, A.S., 2006. Age of the Vallesian Lower Boundary  
903 (Continental Miocene of Europe). *Stratigr. Geol. Correl.* 14, 655-667.
- 904 Vaughan, T.A., Ryan, J.M., Czaplewski, N.J., 2011. *Mammalogy*. 5th ed. Jones and Bartlett  
905 Publishers, Sudbury.
- 906 Vrba, E. S. 1995. On the connections between paleo- climate and evolution. in: Vrba, E.S.,  
907 Denton, G.H., Partridge, T.C., Burckle, L.H. (Eds.), *Paleoclimate and Evolution with*  
908 *Emphasis on Human Origins*. Yale University Press. New Haven. pp. 24–48.
- 909 Weerd, A. D., 1976. Rodent faunas of the Mio-Pliocene continental sediments of the Teruel-  
910 Alfambra region, Spain. Doctoral dissertation, Utrecht University.
- 911 Wessels, W., 2009. Miocene rodent evolution and migration. Muroidea from Pakistan, Turkey  
912 and Northern Africa. *Geologica Ultraiectina* 307. Doctoral dissertation, Departement  
913 Aardwetenschappen.
- 914 Winkler, A.J., 2002. Neogene paleobiogeography and East African paleoenvironments:  
915 contributions from the Tugen Hills rodents and lagomorphs. *J. Hum. Evol.* 42, 237–256.
- 916 Winkler, A.J., Denys, C., Avery, D.M., 2010. Rodentia, in: Werdelin, L., Sanders, W.J. (Eds.),  
917 *Cenozoic mammals of Africa*. Univ of California Press. pp. 261–304.
- 918 Winney, B. J., Hammond, R. L., Macasero, W., Flores, B., Boug, A., Biquand, V., ... & Bruford,  
919 M. W. 2004. Crossing the Red Sea: phylogeography of the hamadryas baboon, *Papio*

920 hamadryas hamadryas. Mol. Ecol. 13, 2819-2827.

921

922

923 **Figure titles**

924 **Figure 1.** Molecular phylogeny of family Muridae based on Bayesian inference (BI) in  
925 MrBayes. Very similar topology was obtained also by maximum likelihood (ML)  
926 analysis in RAxML (see Appendix D). Red points show nodes supported in BI  
927 analysis (posterior probability  $PP \geq 0.95$ ), blue points show high bootstrap support  
928 in ML analysis (bootstrap  $BV \geq 0.70$ ). Violet nodes are supported by both analyses.

929 **Figure 2.** Divergence dating analysis of family Muridae. Nodes show medians of times to most  
930 recent common ancestor (MRCA), node bars indicate 95% HPD intervals. Latin  
931 numbers in yellow squares indicate positions of fossil constrains selected by  
932 multiple-step evaluation and used for final analysis (see Table 4 for more details).

933 **Figure 3.** Ancestral reconstruction for family Muridae with BioGeoBEARS (DEC+J;  $d=0.008$ ;  
934  $e=0$ ;  $j=0.0246$ ;  $\text{LnL}=-117.11$ ). Five biogeographical areas are represented using  
935 different colours: A, West Palearctic (dark blue); B, East Palearctic (light blue); C,  
936 Indomalaya (green); D, Australasia (yellow); E, Afrotropics (red).

937

938

939

940 **Tables:**

941 **Table 1:** Brief summary of taxonomic changes in the family Muridae. The taxonomic position  
942 of particular lineages has changed significantly and they were either considered as  
943 separate families, or included in other families outside Muridae (names of families  
944 are in bold).

945 **Table 2:** PartitionFinder results showing optimum partitioning schemes and best fit models  
946 for each analysis (RAxML, MrBayes, BEAST). Settings: BIC, unlinked branch  
947 lengths, greedy algorithm.

948 **Table 3:** Overview of 18 candidate fossils with stratigraphic age, locality and relevant references. For  
949 more details see Appendix B.

950 **Table 4:** Overview of fossils finally selected for divergence dating, with parameters of uniform  
951 and lognormal prior distribution.

952 **Table 5:** Comparison of models used for BioGeoBEARS; likelihood scores (LnL), number of  
953 parameters (numparams), dispersal rate (d), extinction rate (e), free parameter controlling  
954 the relative probability of founder-event speciation events at cladogenesis (j), corrected  
955 Akaike Information Criterion (AICc), and AICc model weights.

956 **Table 6:** Results of divergence dating analysis. Time to the most common ancestor (MRCA) is  
957 shown as median in Ma, with 95% highest posterior density (HPD). Estimates from  
958 previous studies dealing with divergence dating of murid rodents are reviewed here  
959 for comparison.

960 **Table 7:** Comparison between previous relevant studies.

961  
962

963 **Supplementary material**

964 **Appendix A.** List of taxa and genetic markers.

965 **Appendix B.** Description of considered fossils.

966 **Appendix C.** Results of cross-validation of fossil constraints.

967 **Appendix D.** Maximum likelihood phylogenetic tree.

**Table 1:** Brief summary of taxonomic changes in the family Muridae, The taxonomic position of particular lineages has changed significantly and they were either considered separate families or included in other families outside Muridae (name of families are in bold).

| <b>Simpson (1945)</b>             |                                                     | <b>Chaline et al. (1977)</b>            |                                                                                   | <b>Lavocat (1978)</b>                |                                                                      |
|-----------------------------------|-----------------------------------------------------|-----------------------------------------|-----------------------------------------------------------------------------------|--------------------------------------|----------------------------------------------------------------------|
| <b>Cricetidae</b>                 | Lophiomyinae<br>Gerbillinae                         | <b>Cricetidae</b><br><b>Gerbillidae</b> | Lophiomyinae                                                                      | <b>Nesomyidae</b>                    | Lophiomyinae<br>Gerbillinae                                          |
| <b>Muridae</b>                    | Murinae<br>Otomyinae                                | <b>Muridae</b><br><b>Nesomyidae</b>     | Murinae<br>Otomyinae                                                              | <b>Muridae</b>                       | Otomyinae                                                            |
| <b>Carleton and Musser (1984)</b> |                                                     | <b>Musser and Carleton (2005)</b>       |                                                                                   | <b>Granjon and Montgelard (2012)</b> |                                                                      |
| <b>Muridae</b>                    | Lophiomyinae<br>Gerbillinae<br>Murinae<br>Otomyinae | <b>Cricetidae</b><br><b>Muridae</b>     | Lophiomyinae<br>Otomyinae<br>Gerbillinae<br>Murinae<br>Deomyinae<br>Leimacomyinae | <b>Muridae</b>                       | Lophiomyinae<br>Gerbillinae<br>Murinae<br>Deomyinae<br>Leimacomyinae |

**Table 2:** PartitionFinder results showing optimum partitioning schemes and best fit models for each analysis (RAxML, MrBayes, BEAST). Settings: BIC, unlinked branch lengths, greedy algorithm.

| <b>Analysis</b>          | <b>N. of part</b> | <b>Best sub. model</b> | <b>Subsets</b>                                                                                           |
|--------------------------|-------------------|------------------------|----------------------------------------------------------------------------------------------------------|
| <b>RAxML</b>             | 3                 | GTR+I+G                | 12S, 16S, ATPase8_pos1-pos2, COII_pos1-pos2, COI_pos1-pos2, CYTB_pos1-pos2, tRNA-Asp, tRNA-Lys, tRNA-Ser |
|                          |                   | GTR+I+G                | ATPase8_pos3, COII_pos3, COI_pos3, CYTB_pos3                                                             |
|                          |                   | GTR+I+G                | AP5_pos1-pos3, BRCA_pos1-pos3, BZRP, GHR_pos1-pos3, IRBP_pos1-pos3, RAG_pos1-pos3                        |
| <b>MrBayes and BEAST</b> | 3                 | GTR+I+G                | 12S, 16S, ATPase8_pos1-pos2, COII_pos1-pos2, COI_pos1-pos2, CYTB_pos1-pos2, tRNA-Asp, tRNA-Lys, tRNA-Ser |
|                          |                   | HKY+I+G                | ATPase8_pos3, COII_pos3, COI_pos3, CYTB_pos3                                                             |
|                          |                   | GTR+I+G                | AP5_pos1-pos3, BRCA_pos1-pos3, BZRP, GHR_pos1-pos3, IRBP_pos1-pos3, RAG_pos1-pos3                        |

**Table 3:** Overview of 18 candidate fossils with stratigraphic age, locality and relevant references. For more details see Appendix B.

| Fossil                                            | Final analysis | Reason for excluding | Age (Ma) | Dating                         |                                                               | Fossils                                                       |                                                                         |
|---------------------------------------------------|----------------|----------------------|----------|--------------------------------|---------------------------------------------------------------|---------------------------------------------------------------|-------------------------------------------------------------------------|
|                                                   |                |                      |          | Method                         | References                                                    | Site                                                          | References                                                              |
| † <i>Potwarmus primitivus</i> (Wessels)           | No             | Equivocal placement  | 16.0     | magnetostratigraphy            | time scale of Ogg and Smith (2004)                            | Pakistan, Potwar Plateau, YGSP591                             | Lindsay (1988), Wessels (2009)                                          |
| † <i>Antemus chinjiensis</i> Jacobs               | Yes (1)        |                      | 13.8     | magnetostratigraphy            | Jacobs and Flynn (2005)                                       | Pakistan, Potwar Plateau, YGSP 491                            | Jacobs et al. (1989)                                                    |
| †cf. <i>Progonomys</i> sp. Schaub                 | No             | Equivocal placement  | 11.6     | magnetostratigraphy            | time scale of Ogg and Smith (2004)                            | Pakistan, Potwar Plateau, YGSP 83, YGSP 504                   | Jacobs and Flynn (2005), Cheema et al. (2000), Kimura et al. (in prep.) |
| †cf. <i>Karnimata</i> sp. Jacobs                  | Yes (2)        |                      | 11.2     | magnetostratigraphy            | Kimura et al. (2015) by time scale of Ogg and Smith (2004)    | Pakistan, Siwalik Group, Nagri Formation, YGSP 791, YGSP 797, | Jacobs and Flynn (2005); Kimura et al. (2015)                           |
| † <i>Parapodemus lungdunensis</i> Schau           | Yes (3)        |                      | 9.6      | magnetostratigraphy            | Daxner-Höck (2003)                                            | France, Dionay                                                | Lungu (1981), Mein et al. (1993), Renaud et al. (1999)                  |
| † <i>Karnimata darwini</i> Jacobs                 | Yes (4)        |                      | 9.2      | magnetostratigraphy            | Kimura et al. (2015) by time scale of Ogg and Smith (2004)    | Pakistan, Siwalik Group, Dhok Pathan Formation, YGSP 182      | Jacobs (1978); Kimura et al. (2015)                                     |
| † <i>Abudhabia pakistanensis</i> Flynn and Jacobs | Yes (5)        |                      | 8.7      | magnetostratigraphy            | Flynn and Jacobs (1999) by time scale of Ogg and Smith (2004) | Pakistan, Siwalik Group, Dhok Pathan Formation, YGSP387       | Flynn and Jacobs (1999)                                                 |
| †aff. <i>Stenocephalomys</i> Frick                | No             | Equivocal placement  | 8.5      | $^{40}\text{K}/^{40}\text{Ar}$ | Geraads et al. (2002), Suwa et al. (2015)                     | Ethiopia, Chorora                                             | Geraads (2001)                                                          |
| †cf. <i>Parapelomys</i> Jacobs                    | No             | Equivocal placement  | 8.5      | $^{40}\text{K}/^{40}\text{Ar}$ | Geraads et al. (2002), Suwa et al. (2015)                     | Ethiopia, Chorora                                             | Geraads (2001)                                                          |

**Table 3 (continued)**

| Fossil                              | Final analysis | Reason for excluding | Age (Ma) | Dating                                                                                                           |                                                            | Fossils                                                  |                            |
|-------------------------------------|----------------|----------------------|----------|------------------------------------------------------------------------------------------------------------------|------------------------------------------------------------|----------------------------------------------------------|----------------------------|
|                                     |                |                      |          | Method                                                                                                           | References                                                 | Site                                                     | References                 |
| † <i>Preacomys kikiæ</i><br>Geraads | No             | Equivocal placement  | 8.5      | $^{40}\text{K}/^{40}\text{Ar}$                                                                                   | Geraads et al. (2002), Suwa et al. (2015)                  | Ethiopia, Chorora                                        | Geraads (2001)             |
| † <i>Mus</i> sp. Linneaus           | Yes (6)        |                      | 8.0      | magnetostratigraphy                                                                                              | Kimura et al. (2015) by time scale of Ogg and Smith (2004) | Pakistan, Siwalik Group, Dhok Pathan Formation, YGSP 547 | Kimura et al. (2013; 2015) |
| † <i>Acomys</i> sp. I. Geoffroy     | No             | missing M1           | 6.1      | $^{40}\text{Ar} / ^{39}\text{Ar}$                                                                                | Deino and Ambrose (2007)                                   | Kenya, Lemudong'o, locality 1                            | Manthi (2007)              |
| † <i>Aethomys</i> sp. Thomas        | Yes (7)        |                      | 6.1      | $^{40}\text{Ar} / ^{39}\text{Ar}$                                                                                | Deino and Ambrose (2007)                                   | Kenya, Lemudong'o, locality 1                            | Manthi (2007)              |
| † <i>Arvicanthis</i> sp. Lesson     | Yes (8)        |                      | 6.1      | $^{40}\text{Ar} / ^{39}\text{Ar}$                                                                                | Deino and Ambrose (2007)                                   | Kenya, Lemudong'o, locality 1                            | Manthi (2007)              |
| † <i>Gerbilliscus</i> sp. (Thomas)  | Yes (9)        |                      | 6.1      | $^{40}\text{Ar} / ^{39}\text{Ar}$                                                                                | Deino and Ambrose (2007)                                   | Kenya, Lemudong'o, locality 1                            | Manthi (2007)              |
| † <i>Lemniscomys</i> sp. Trouessart | No             | missing M1           | 6.1      | $^{40}\text{Ar} / ^{39}\text{Ar}$                                                                                | Deino and Ambrose (2007)                                   | Kenya, Lemudong'o, locality 1                            | Manthi (2007)              |
| † <i>Mastomys</i> sp. Thomas        | No             | cross-validation     | 6.1      | $^{40}\text{Ar} / ^{39}\text{Ar}$                                                                                | Deino and Ambrose (2007)                                   | Kenya, Lemudong'o, locality 1                            | Manthi (2007)              |
| † <i>Gerbillus</i> sp. Desmarest    | No             | cross-validation     | 2.4      | geochronology (BKT-3 tephra), $^{40}\text{K}/^{40}\text{Ar}$ , $^{40}\text{Ar} / ^{39}\text{Ar}$ ; sedimentology | Kimbel et al. (1996), Campisano and Feibel (2008)          | Ethiopia, Hadar, AL894                                   | Reed (2011)                |



**Table 4:** Overview of fossils finally selected for divergence dating, with parameters of uniform and lognormal prior distribution.

|   | Fossil                           | Position                               | Stem/Crown | Age (Ma) | Uniform distribution |       | Lognormal distribution |     |      |
|---|----------------------------------|----------------------------------------|------------|----------|----------------------|-------|------------------------|-----|------|
|   |                                  |                                        |            |          | Min                  | Max   | Offset                 | Log | Mean |
| 1 | † <i>Antemus chinjiensis</i>     | crown Murinae                          | crown      | 13.8     | 13.24                | 25.29 | 13.24                  | 1.0 | 3.2  |
| 2 | †cf. <i>Karnimata</i> sp.        | <i>Mus/Arvicanthis</i> split           | crown      | 11.2     | 10.47                | 25.37 | 10.47                  | 1.0 | 4.0  |
| 3 | † <i>Parapodemus lugdunensis</i> | <i>Apodemus/Tokudaia</i> split         | stem       | 9.6      | 8.93                 | 25.41 | 8.93                   | 1.0 | 4.5  |
| 4 | † <i>Karnimata darwini</i>       | TMRCA Millardini/Otomyini/Arvicanthini | crown      | 9.2      | 8.52                 | 25.42 | 8.52                   | 1.0 | 4.6  |
| 5 | † <i>Abudhabia pakistanensis</i> | <i>Gerbilliscus/Desmodillus</i> split  | crown      | 8.7      | 8.01                 | 25.43 | 8.01                   | 1.0 | 4.7  |
| 6 | † <i>Mus</i> sp.                 | Murini                                 | stem       | 8.0      | 7.29                 | 25.45 | 7.29                   | 1.0 | 4.9  |
| 7 | † <i>Aethomys</i> sp.            | <i>Aethomys</i>                        | stem       | 6.1      | 5.34                 | 25.50 | 5.34                   | 1.0 | 5.5  |
| 8 | † <i>Arvicanthis</i> sp.         | <i>Arvicanthis</i>                     | stem       | 6.1      | 5.34                 | 25.50 | 5.34                   | 1.0 | 5.5  |
| 9 | † <i>Gerbilliscus</i> sp.        | <i>Gerbilliscus</i>                    | stem       | 6.1      | 5.34                 | 25.50 | 5.34                   | 1.0 | 5.5  |

**Table 5:** Comparison of models used for BioGeoBEARS; likelihood scores (LnL), number of parameters (numparams), dispersal rate (d), extinction rate (e), free parameter controlling the relative probability of founder-event speciation events at cladogenesis (j), corrected Akaike Information Criterion (AICc), and AICc model weights.

|                | <b>LnL</b> | <b>numparams</b> | <b>d</b> | <b>e</b> | <b>j</b> | <b>AICc</b> | <b>AICc wt</b> |
|----------------|------------|------------------|----------|----------|----------|-------------|----------------|
| DEC            | -133.724   | 2                | 0.005    | 0.000    | 0.000    | 271.525     | 0.05181        |
| DEC +J         | -129.826   | 3                | 0.004    | 0.000    | 0.008    | 265.806     | 0.90415        |
| DIVALIKE       | -146.958   | 2                | 0.007    | 0.000    | 0.000    | 297.993     | 9.2665e-08     |
| DIVALIKE +J    | -132.856   | 3                | 0.004    | 0.000    | 0.012    | 271.866     | 0.04369        |
| BAYAREALIKE    | -178.311   | 2                | 0.005    | 0.036    | 0.000    | 360.698     | 2.2423e-21     |
| BAYAREALIKE +J | -137.687   | 3                | 0.003    | 0.000    | 0.014    | 281.528     | 0.00035        |

**Table 6:** Results of divergence dating analysis. Time to the most common ancestor (TMRCA) is shown as median in Ma, with 95% highest posterior density (HPD). Estimates from previous studies dealing with divergence dating of murid rodents are reviewed here for comparison.

| <b>TMRCA</b>   | <b>median</b> | <b>2.5%</b> | <b>97.5%</b> | <b>Steppan et al.<br/>(2004)</b> | <b>Lecompte et al.<br/>(2008)</b> | <b>Rowe et al.<br/>(2011)</b> | <b>Fabre et al.<br/>(2012)</b> | <b>Fabre et al.<br/>(2013)</b> | <b>Schenk et al.<br/>(2013)</b> | <b>Bryja et al.<br/>(2014)</b> | <b>Rowe et al.<br/>(2016b)</b> |
|----------------|---------------|-------------|--------------|----------------------------------|-----------------------------------|-------------------------------|--------------------------------|--------------------------------|---------------------------------|--------------------------------|--------------------------------|
| Muridae        | 19.3          | 17.06       | 21.92        | 22.5                             |                                   |                               | ~33-23                         |                                | ~21.0                           |                                |                                |
| Lophiomyinae*  | 18.6          | 16.35       | 21.11        |                                  |                                   |                               |                                |                                |                                 |                                |                                |
| Gerbillinae    | 12.2          | 10.46       | 14.16        | 9.3                              |                                   |                               | ~23-5                          |                                | ~10.0                           |                                |                                |
| Deomyinae      | 14.6          | 12.68       | 16.82        | 13.1                             |                                   |                               | ~23-5                          |                                | ~13.0                           |                                |                                |
| Murinae        | 14.2          | 12.70       | 16.07        | 12.0                             | 12.3                              | 13.3                          | ~23-5                          |                                | ~14.5                           |                                | ~14.0                          |
| "core Murinae" | 12.3          | 11.28       | 13.62        | 10.3                             | 11.3                              |                               |                                | 11.60                          | ~12.5                           |                                | ~12.5                          |
| Phloeomyini    | 9.8           | 7.72        | 11.85        |                                  | 8.6                               |                               |                                |                                | ~10.0                           |                                | ~10.5                          |
| Rattini        | 10.4          | 9.23        | 11.93        |                                  | 9.7                               |                               |                                | 8.70                           | ~11.0                           |                                | ~11.0                          |
| Hydromyini     | 10.4          | 9.31        | 11.71        |                                  | 8.9                               |                               |                                |                                | ~11.0                           |                                | ~11.0                          |
| Malacomyini    | 3.4           | 2.35        | 4.60         |                                  |                                   |                               |                                |                                |                                 | 4.4                            |                                |
| Apodemini      | 9.0           | 7.92        | 10.13        |                                  | 9.6                               |                               |                                |                                | ~7.5                            | 9.5                            | ~7.5                           |
| Murini         | 7.2           | 6.24        | 8.29         |                                  | 6.6                               | 5.3                           |                                |                                | ~6.0                            | 7.4                            | ~6.5                           |
| Praomyini      | 6.8           | 6.05        | 7.77         |                                  | 7.6                               |                               |                                |                                | ~5.0                            | 6.8                            | ~6.0                           |
| Millardini     | 9.2           | 7.72        | 10.75        |                                  |                                   |                               |                                |                                |                                 |                                |                                |
| Otomyini       | 4.9           | 4.12        | 5.98         |                                  |                                   |                               |                                |                                | ~6.0                            | 3.8                            | ~3.0                           |
| Arvicanthini   | 8.8           | 7.92        | 9.72         |                                  | 8.4                               | 7.3                           |                                |                                | ~7.5                            | 7.8                            | ~8.5                           |

\* offshoot from Gerbillinae + Deomyinae

**Table 7:** Comparison between previous relevant studies.

| Author                 | Focus                                                     | Subfamilies | # genera | # species | Fossils in Muridae | # genetic markers |
|------------------------|-----------------------------------------------------------|-------------|----------|-----------|--------------------|-------------------|
| Fabre et al. (2012)    | Rodentia                                                  | 4           | 105      | 302       | 0                  | 11 (8)*           |
| Schenk et al. (2013)   | Muroidea                                                  | 4           | 85       | 136       | 4                  | 4                 |
| our study              | Muridae                                                   | 4           | 82       | 160       | 9                  | 15                |
| Rowe et al. (2008)     | Hydromyini (outgroup all Murinae + Gerbillinae+Deomyinae) | 3           | 66       | 78        | 2                  | 8                 |
| Lecompte et al. (2008) | Murinae                                                   | 3           | 46       | 83        | 2                  | 3                 |

\* 11 genetic markers for Rodentia, only 8 for Muridae



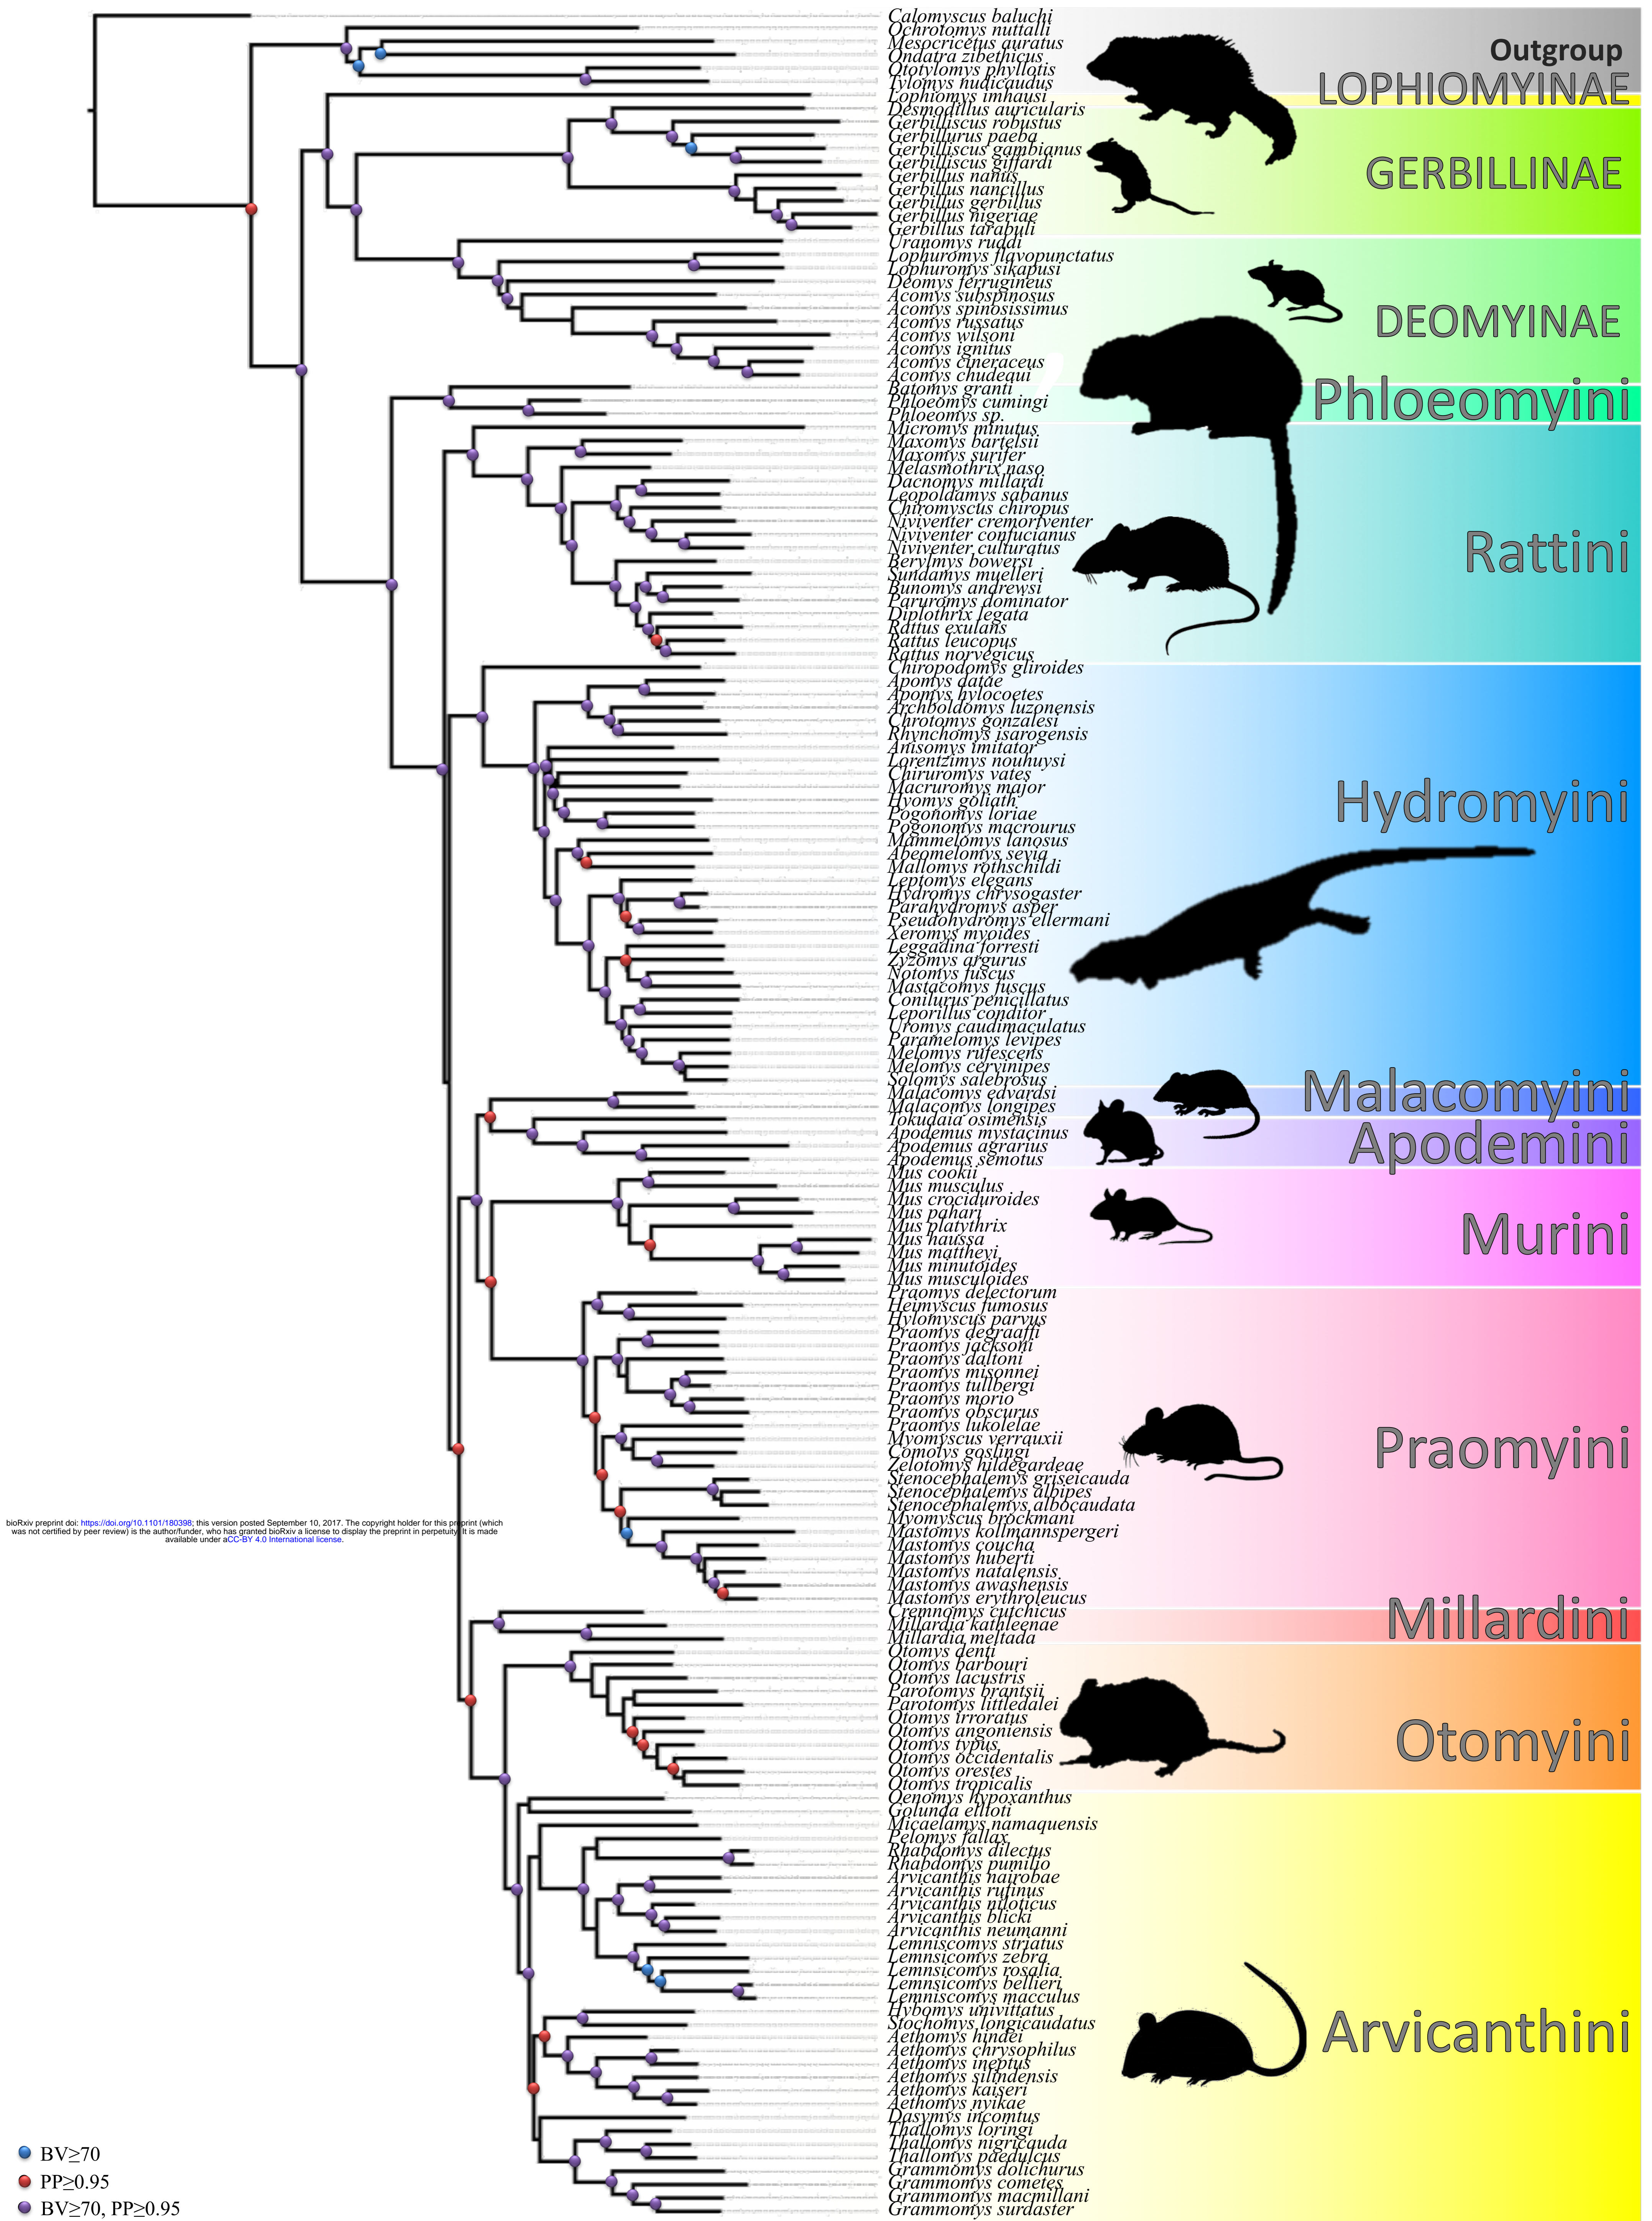

bioRxiv preprint doi: <https://doi.org/10.1101/190398>; this version posted September 10, 2017. The copyright holder for this preprint (which was not certified by peer review) is the author/funder, who has granted bioRxiv a license to display the preprint in perpetuity. It is made available under aCC-BY 4.0 International license.



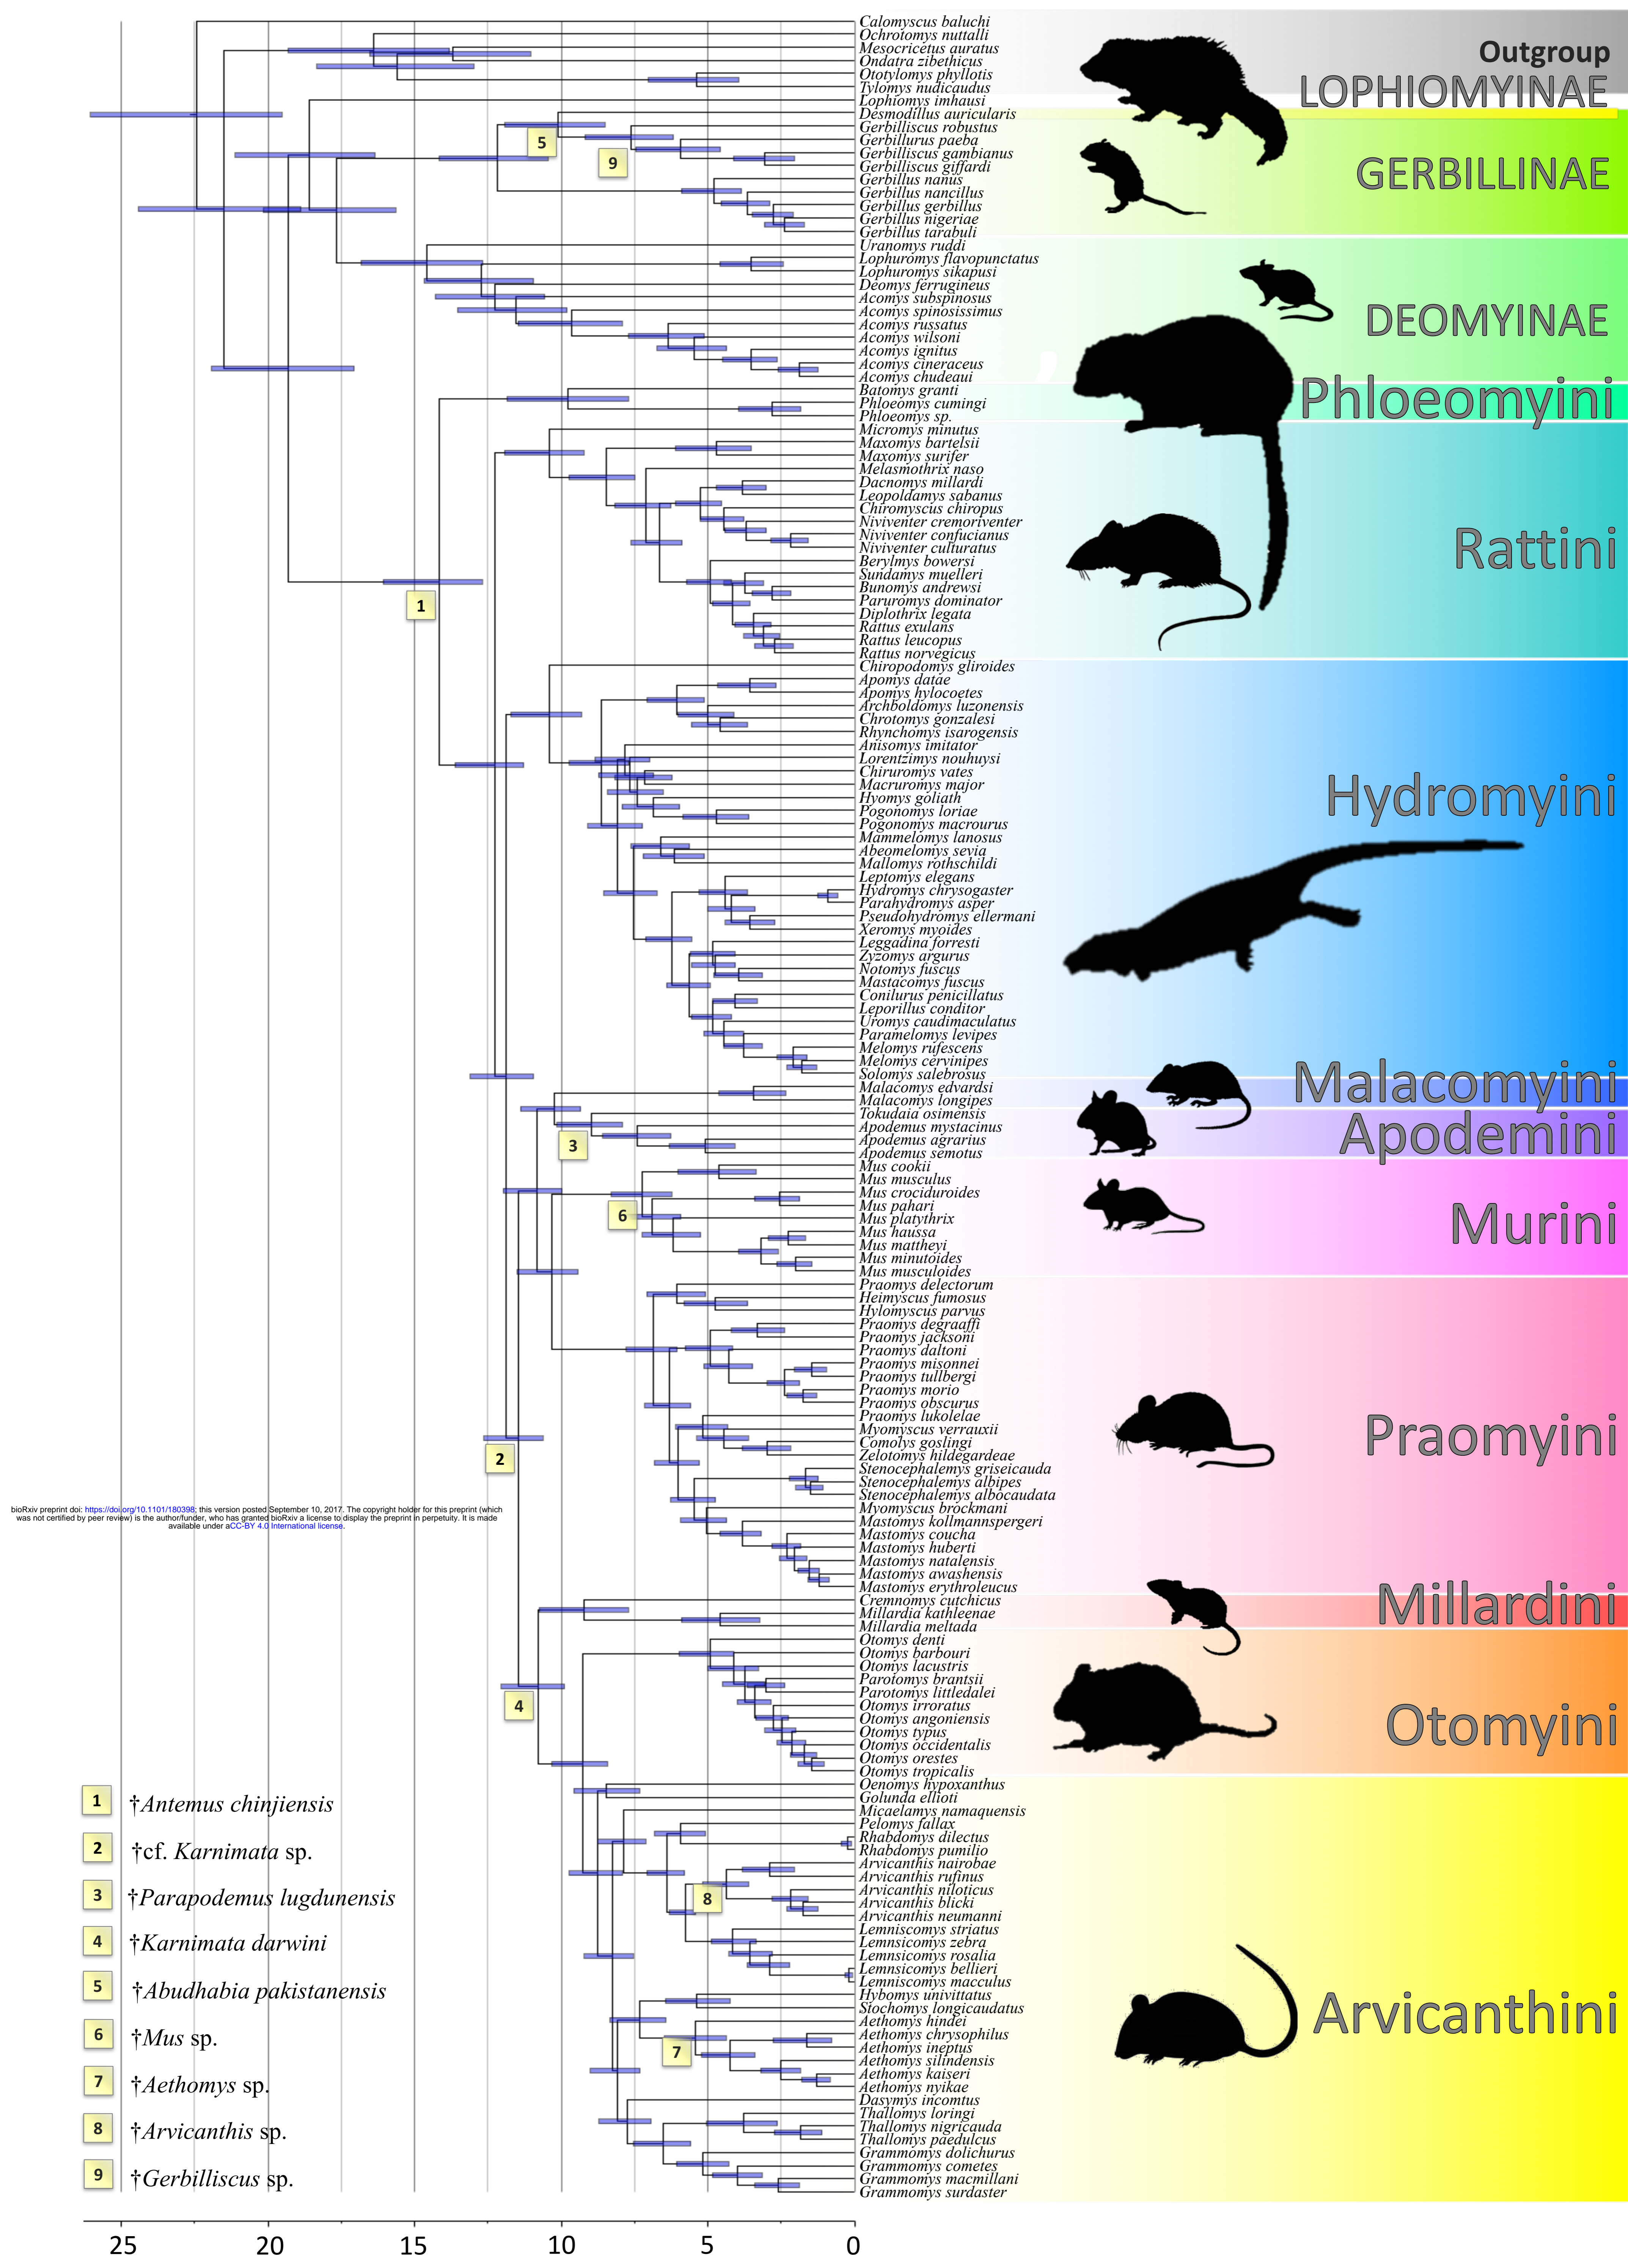

bioRxiv preprint doi: <https://doi.org/10.1101/190396>; this version posted September 10, 2017. The copyright holder for this preprint (which was not certified by peer review) is the author/funder, who has granted bioRxiv a license to display the preprint in perpetuity. It is made available under aCC-BY 4.0 International license.

25 20 15 10 5 0



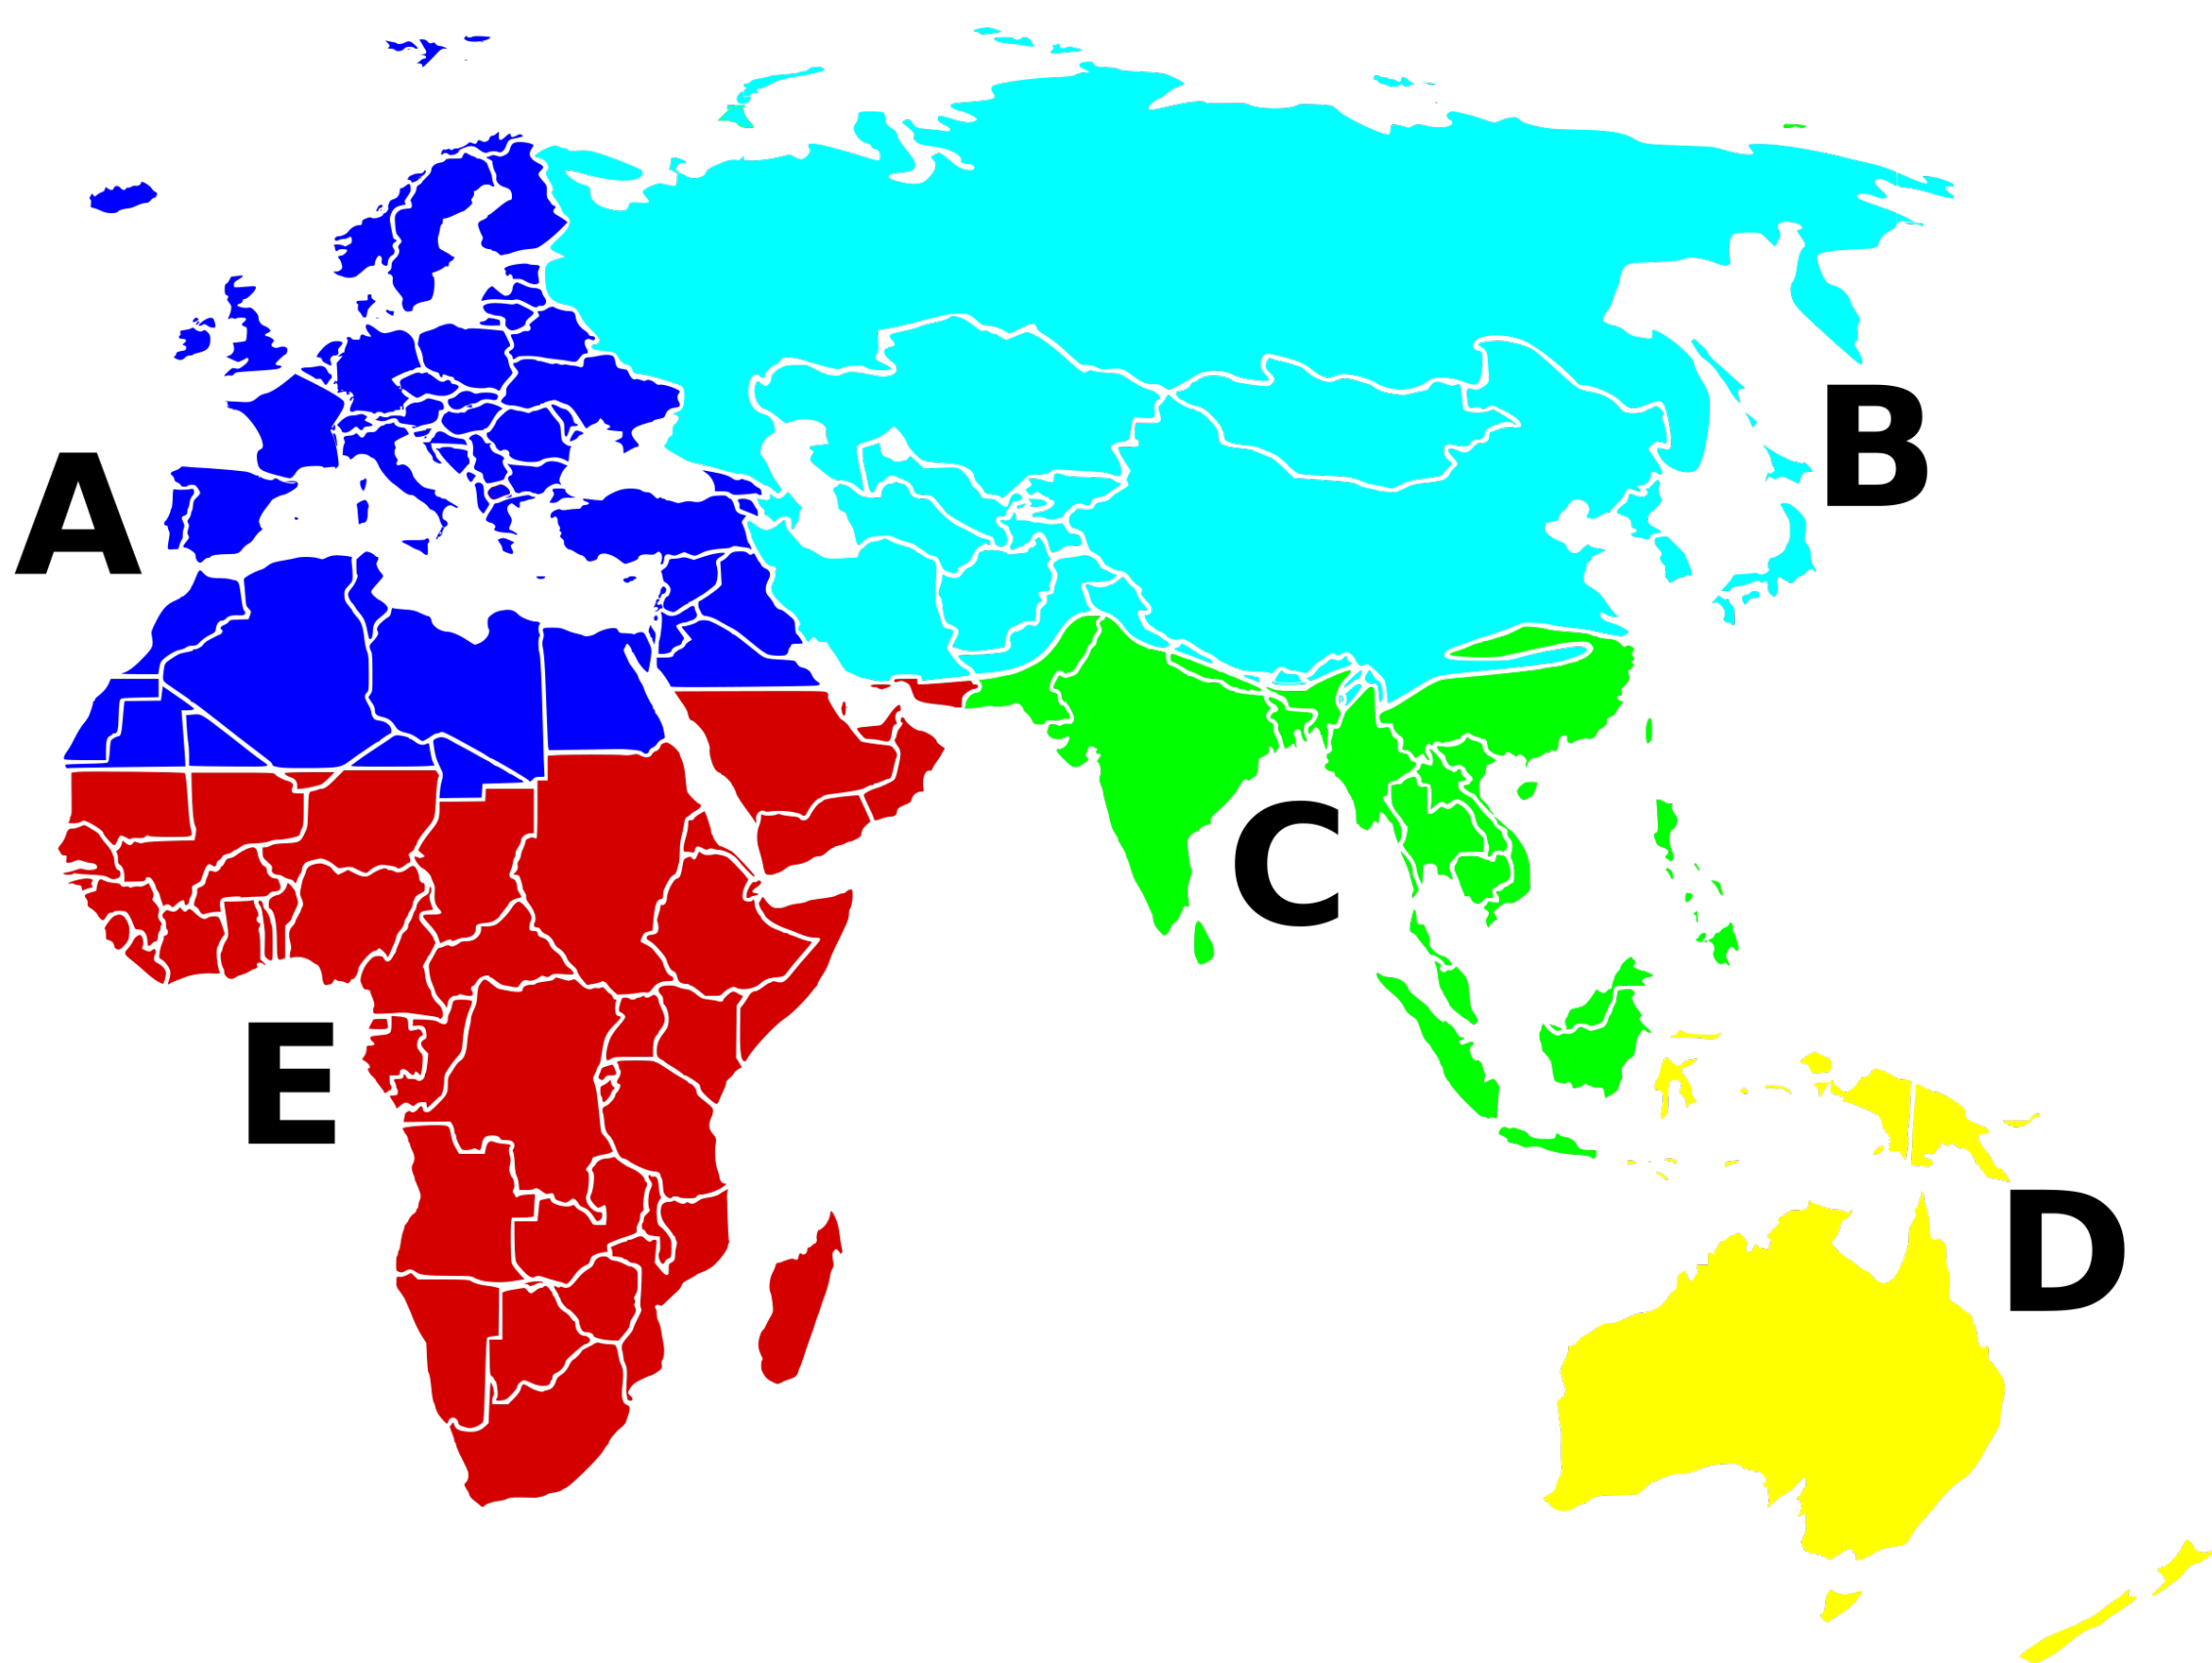

bioRxiv preprint doi: <https://doi.org/10.1101/180398>; this version posted September 10, 2017. The copyright holder for this preprint (which was not certified by peer review) is the author/funder, who has granted bioRxiv a license to display the preprint in perpetuity. It is made available under aCC-BY 4.0 International license.

### Legend

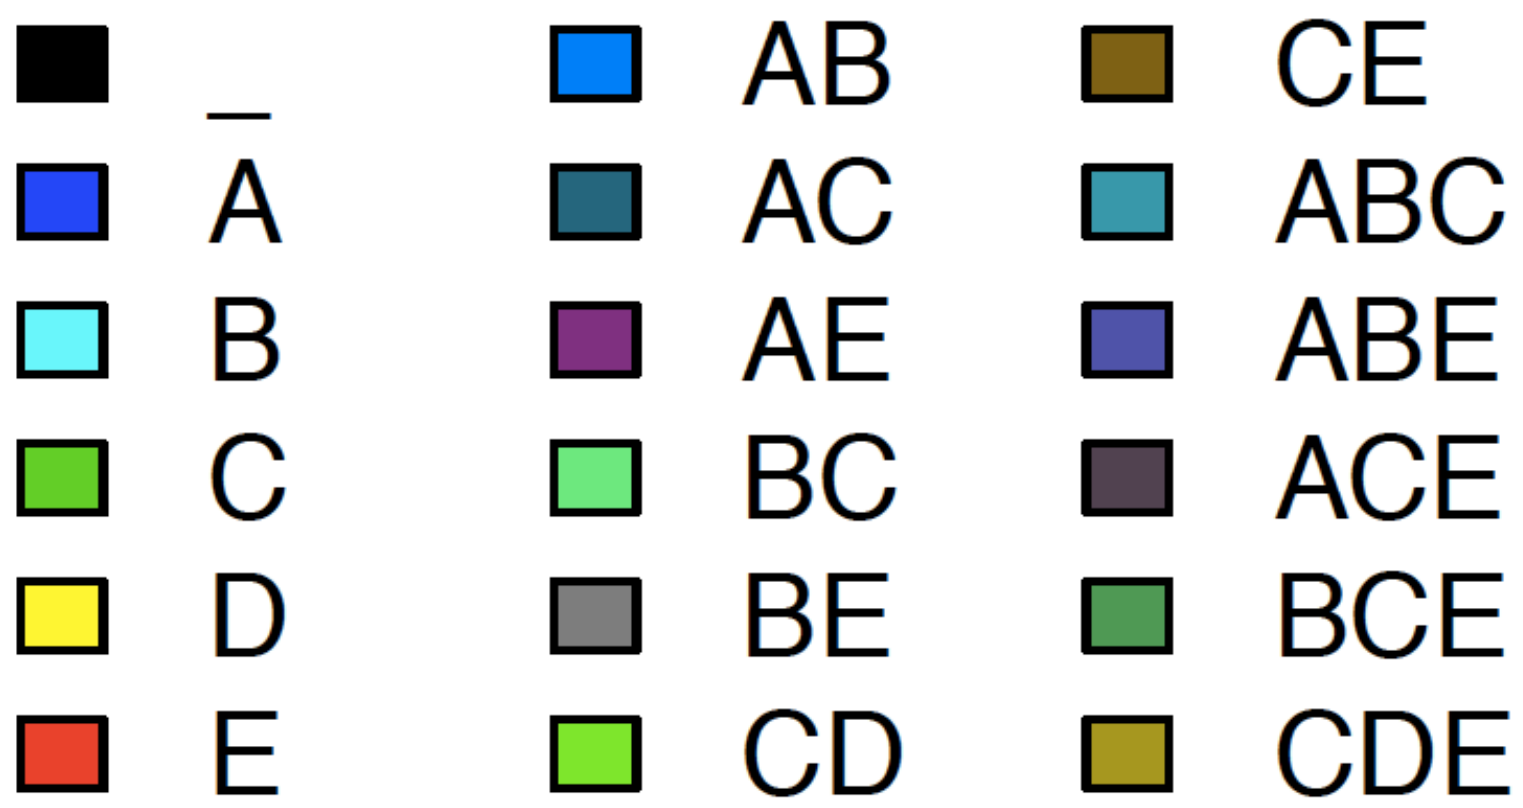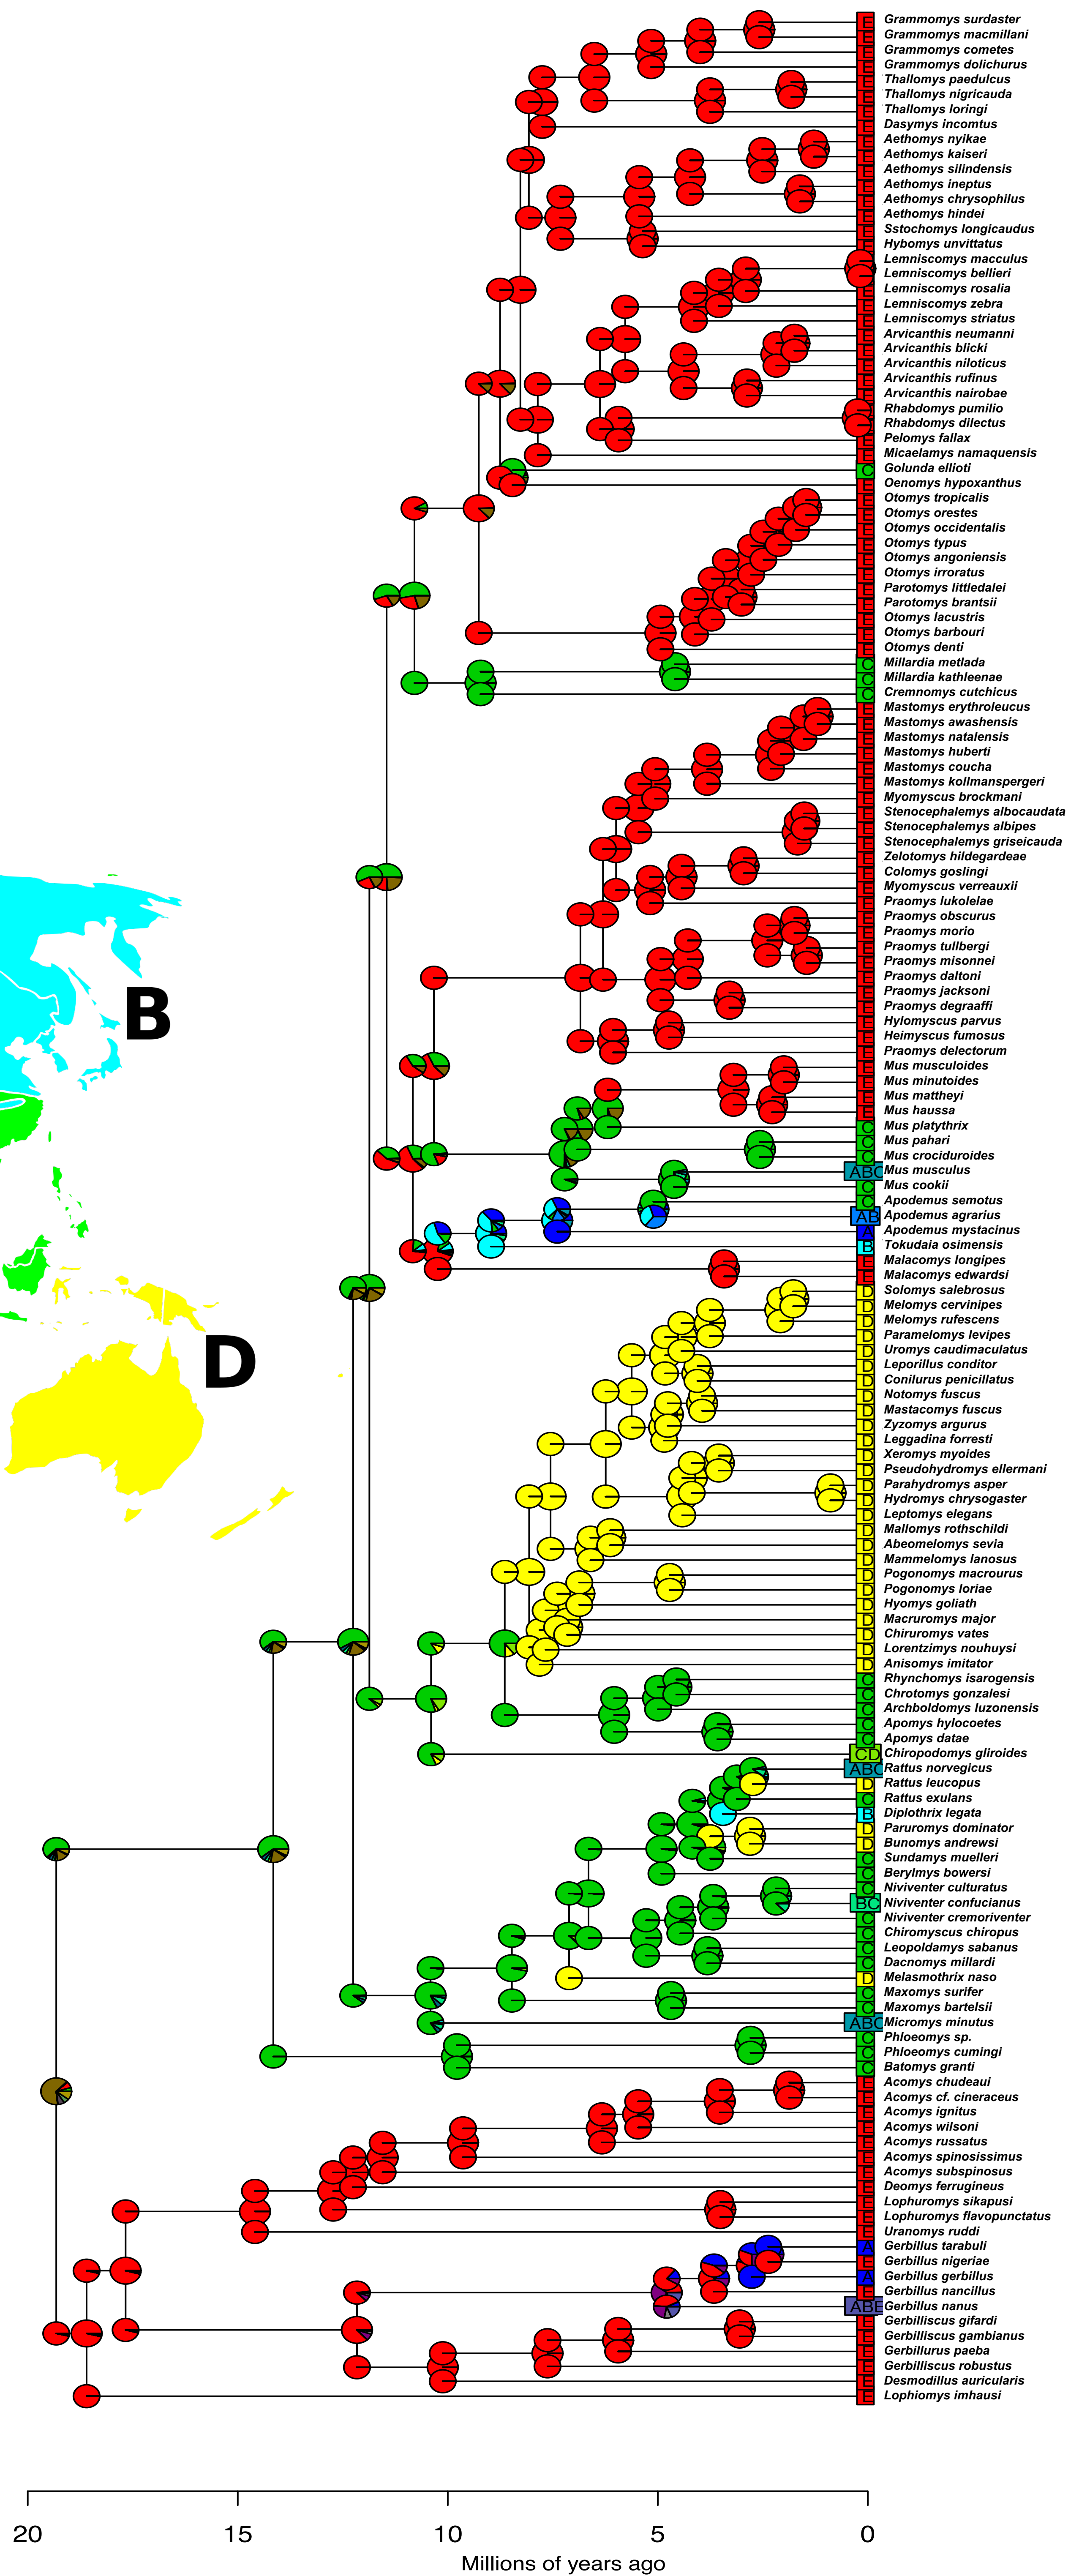

20 15 10 5 0  
Millions of years ago
